# Supplementary material for: Transcriptome-wide gene-gene interaction associations elucidate pathways and functional enrichment of complex traits
Source: PLoS Genet. 2023 May 22;19(5):e1010693. doi: 10.1371/journal.pgen.1010693 (PMC10237671; doi:10.1371/journal.pgen.1010693)
Supplement: S9 Table — Included are the test statistics before and after removing pairs of genes that are either nearby (<1Mb apart) or have correlated imputed expression (|r|>0.05). (XLSX) [file pgen.1010693.s050.xlsx]

## Sheet: S9
S9 Table. Neuronal cell type gene set association statistics for each trait using expression in each tissue. Included are the test statistics before and after removing pairs of genes that are either nearby (<1Mb apart) or have correlated imputed expression (|r|>0.05).
			Gene Set Size		Number of Gene Pairs		Gene Set Association Statistic
Trait	Expression/Tissue	Cell Type Name	In Full Dataset	Present in TWIS Dataset	In TWIS	After removing thresholded pairs	c2	p	c2 After removing thresholded pairs	p (after removing thresholded pairs)
BMI	cortex.PEC	ASC1	1800	1211	732655	731541	733594	0.218954	732345	0.253122
BMI	cortex.PEC	ASC2	1817	1184	700336	699226	701157	0.243973	699923	0.277627
BMI	cortex.PEC	END	1888	1107	612171	611101	614616	0.0136526	613382	0.0196317
BMI	cortex.PEC	exCA1	1812	1170	683865	682767	683811	0.518049	682601	0.55628
BMI	cortex.PEC	exCA3	1788	1159	671061	669973	671326	0.409485	670078	0.463801
BMI	cortex.PEC	exDG	1766	1151	661825	660829	661349	0.660429	660276	0.684488
BMI	cortex.PEC	exPFC1	1748	1186	702705	701790	701814	0.773761	700812	0.795451
BMI	cortex.PEC	exPFC2	1754	1208	729028	728078	728535	0.658421	727457	0.696407
BMI	cortex.PEC	GABA1	1804	1148	658378	657433	658296	0.528109	657177	0.588026
BMI	cortex.PEC	GABA2	1817	1120	626640	625787	627386	0.252473	626483	0.266756
BMI	cortex.PEC	MG	1819	1163	675703	674667	674071	0.919925	672853	0.940888
BMI	cortex.PEC	NSC	1801	1179	694431	693449	693925	0.666119	692724	0.730761
BMI	cortex.PEC	ODC1	1757	1201	720600	719572	719221	0.874733	718072	0.894514
BMI	cortex.PEC	OPC	1800	1140	649230	648437	649377	0.448345	648499	0.477893
BMI	cortex.PEC	PI_genes	3524	1742	1516411	1514376	1.51583e+06	0.629704	1.51332e+06	0.728348
BMI	cortex.PEC	PIxASC1	344	172	14706	14688	14523.2	0.856835	14497.7	0.866828
BMI	cortex.PEC	PIxASC2	325	150	11175	11166	11010	0.865418	10996.3	0.872207
BMI	cortex.PEC	PIxEND	390	204	20706	20679	20504.4	0.839112	20480.7	0.835237
BMI	cortex.PEC	PIxexCA1	433	230	26335	26302	26389.4	0.405289	26355.1	0.407381
BMI	cortex.PEC	PIxexCA3	416	232	26796	26754	26814.5	0.466939	26759.2	0.489815
BMI	cortex.PEC	PIxexDG	441	239	28441	28401	28119.1	0.911782	28069.5	0.918275
BMI	cortex.PEC	PIxexPFC1	363	216	23220	23199	23082.6	0.7375	23053	0.750494
BMI	cortex.PEC	PIxexPFC2	315	214	22791	22770	22798.1	0.485507	22769	0.500684
BMI	cortex.PEC	PIxGABA1	401	198	19503	19481	19309.6	0.836236	19297.7	0.823311
BMI	cortex.PEC	PIxGABA2	503	247	30381	30345	30389.9	0.484498	30353.2	0.485665
BMI	cortex.PEC	PIxMG	373	203	20503	20473	20660.4	0.218043	20624.4	0.226702
BMI	cortex.PEC	PIxNSC	291	144	10296	10284	10494.2	0.0842621	10477.4	0.0892934
BMI	cortex.PEC	PIxODC1	372	234	27261	27233	27135.4	0.703905	27108	0.703134
BMI	cortex.PEC	PIxOPC	387	181	16290	16271	16307.3	0.460337	16285.5	0.466607
BMI	sCCA1	ASC1	1646	1095	598965	597880	598303	0.727295	597066	0.771568
BMI	sCCA1	ASC2	1668	1087	589155	588056	588404	0.75532	587166	0.794105
BMI	sCCA1	END	1828	1270	805815	803930	807573	0.0831205	805251	0.148747
BMI	sCCA1	exCA1	1622	918	420903	419929	422147	0.0876592	421081	0.104411
BMI	sCCA1	exCA3	1620	913	416328	415355	416948	0.248252	415834	0.299364
BMI	sCCA1	exDG	1595	901	405450	404604	404909	0.725876	403926	0.774462
BMI	sCCA1	exPFC1	1546	816	332520	331863	331725	0.835224	330993	0.857194
BMI	sCCA1	exPFC2	1574	906	409965	409195	411476	0.0476895	410658	0.0530261
BMI	sCCA1	GABA1	1627	911	413595	412833	413638	0.480741	412765	0.52963
BMI	sCCA1	GABA2	1694	907	410871	410068	409295	0.959054	408267	0.976731
BMI	sCCA1	MG	1700	1249	779376	777995	777966	0.870667	776228	0.921754
BMI	sCCA1	NSC	1703	1157	668746	667461	668775	0.489657	667325	0.546528
BMI	sCCA1	ODC1	1637	1164	676866	675748	679514	0.0114921	678244	0.0159906
BMI	sCCA1	OPC	1673	1022	521731	520962	519606	0.981356	518738	0.985429
BMI	sCCA1	PI_genes	3373	2015	2029105	2025550	2.02813e+06	0.685099	2.02404e+06	0.773005
BMI	sCCA1	PIxASC1	323	182	16471	16443	16100.7	0.979928	16070.9	0.980473
BMI	sCCA1	PIxASC2	300	164	13366	13351	13384	0.454455	13361.3	0.473277
BMI	sCCA1	PIxEND	363	243	29403	29352	29220.2	0.77421	29174	0.768297
BMI	sCCA1	PIxexCA1	403	215	23005	22966	23481	0.013657	23439.8	0.0139387
BMI	sCCA1	PIxexCA3	405	219	23871	23831	23827.4	0.577876	23777.5	0.595605
BMI	sCCA1	PIxexDG	418	225	25200	25151	25484.8	0.10261	25417.8	0.117319
BMI	sCCA1	PIxexPFC1	359	171	14535	14504	14439	0.712418	14386.5	0.75423
BMI	sCCA1	PIxexPFC2	313	170	14365	14341	14385.9	0.449331	14352.8	0.470718
BMI	sCCA1	PIxGABA1	379	176	15400	15372	15320.8	0.673037	15306.4	0.644561
BMI	sCCA1	PIxGABA2	467	223	24753	24701	24794.1	0.425632	24739.9	0.429369
BMI	sCCA1	PIxMG	366	241	28920	28876	28649.2	0.870094	28576.6	0.893905
BMI	sCCA1	PIxNSC	269	165	13530	13511	13531.2	0.495401	13511.2	0.497848
BMI	sCCA1	PIxODC1	364	244	29646	29605	29616.6	0.547019	29575.3	0.547446
BMI	sCCA1	PIxOPC	349	184	16836	16805	16540.6	0.946902	16511.1	0.946161
BMI	sCCA2	ASC1	1646	1047	547581	546590	547560	0.507846	546396	0.573402
BMI	sCCA2	ASC2	1668	1038	538203	537187	539465	0.112046	538273	0.147434
BMI	sCCA2	END	1828	1204	724206	722531	724077	0.54249	722087	0.643847
BMI	sCCA2	exCA1	1622	884	390286	389384	391027	0.200618	389929	0.268184
BMI	sCCA2	exCA3	1620	875	382375	381519	385062	0.00108283	384131	0.00141921
BMI	sCCA2	exDG	1595	855	365085	364382	364472	0.763219	363646	0.80553
BMI	sCCA2	exPFC1	1546	781	304590	303999	303845	0.830021	303145	0.863281
BMI	sCCA2	exPFC2	1574	867	375411	374701	374314	0.897289	373509	0.915841
BMI	sCCA2	GABA1	1627	869	377146	376454	376753	0.674353	376007	0.696489
BMI	sCCA2	GABA2	1694	858	367653	366945	370936	6.7225e-05	370049	0.000150487
BMI	sCCA2	MG	1700	1181	696790	695567	697390	0.305392	695883	0.394071
BMI	sCCA2	NSC	1703	1101	605550	604409	605962	0.353827	604661	0.409079
BMI	sCCA2	ODC1	1637	1096	600060	599089	599393	0.728635	598295	0.765781
BMI	sCCA2	OPC	1673	966	466095	465395	465526	0.721978	464691	0.76715
BMI	sCCA2	PI_genes	3373	1861	1728870	1725851	1.73184e+06	0.0549823	1.72815e+06	0.107622
BMI	sCCA2	PIxASC1	323	171	14535	14509	14571.2	0.41443	14538	0.430866
BMI	sCCA2	PIxASC2	300	156	12090	12076	11803	0.968307	11780.5	0.972101
BMI	sCCA2	PIxEND	363	228	25878	25833	25760	0.69726	25695.7	0.726501
BMI	sCCA2	PIxexCA1	403	202	20301	20267	20354.9	0.393422	20310	0.414259
BMI	sCCA2	PIxexCA3	405	205	20910	20874	21019	0.296225	20966.2	0.32491
BMI	sCCA2	PIxexDG	418	202	20301	20272	20437.8	0.247979	20406.5	0.251469
BMI	sCCA2	PIxexPFC1	359	159	12561	12535	12580.7	0.448992	12547.3	0.467472
BMI	sCCA2	PIxexPFC2	313	158	12403	12384	12566.4	0.149843	12546.3	0.151296
BMI	sCCA2	PIxGABA1	379	165	13530	13504	13532.4	0.49255	13503.3	0.500093
BMI	sCCA2	PIxGABA2	467	199	19701	19662	20361.9	0.000489455	20307.8	0.00063018
BMI	sCCA2	PIxMG	366	222	24531	24496	24394.5	0.730501	24332.2	0.769946
BMI	sCCA2	PIxNSC	269	152	11476	11462	11486.6	0.470276	11468.9	0.480006
BMI	sCCA2	PIxODC1	364	227	25651	25614	25474	0.782387	25431.4	0.789807
BMI	sCCA2	PIxOPC	349	169	14196	14171	14163.6	0.574732	14110.1	0.640014
BMI	sCCA3	ASC1	1646	1009	508536	507615	510076	0.0635057	509044	0.0782175
BMI	sCCA3	ASC2	1668	992	491536	490628	493382	0.0314564	492337	0.0423305
BMI	sCCA3	END	1828	1150	660675	659145	662119	0.104566	660346	0.147713
BMI	sCCA3	exCA1	1622	834	347361	346553	348085	0.192565	347146	0.238117
BMI	sCCA3	exCA3	1620	843	354903	354075	354654	0.616156	353822	0.618074
BMI	sCCA3	exDG	1595	828	342378	341712	340019	0.997856	339232	0.998678
BMI	sCCA3	exPFC1	1546	763	290703	290126	290140	0.769617	289441	0.815831
BMI	sCCA3	exPFC2	1574	844	355746	355089	355612	0.562612	354826	0.622176
BMI	sCCA3	GABA1	1627	840	351541	350896	350937	0.76408	350160	0.810248
BMI	sCCA3	GABA2	1694	835	348195	347516	349213	0.111311	348397	0.145368
BMI	sCCA3	MG	1700	1133	641278	640115	641509	0.418935	640255	0.450381
BMI	sCCA3	NSC	1703	1054	554931	553938	554927	0.501405	553843	0.535689
BMI	sCCA3	ODC1	1637	1056	557040	556112	559305	0.016033	558248	0.021532
BMI	sCCA3	OPC	1673	940	441330	440652	440501	0.81127	439805	0.816507
BMI	sCCA3	PI_genes	3373	1766	1558495	1555797	1.55917e+06	0.351901	1.55599e+06	0.455289
BMI	sCCA3	PIxASC1	323	155	11935	11915	11958	0.439197	11936	0.444323
BMI	sCCA3	PIxASC2	300	138	9453	9441	9438.84	0.539111	9429.74	0.530738
BMI	sCCA3	PIxEND	363	218	23653	23613	23506.9	0.748644	23457.5	0.76238
BMI	sCCA3	PIxexCA1	403	184	16836	16802	16696.4	0.776095	16658.6	0.782493
BMI	sCCA3	PIxexCA3	405	193	18528	18494	18339.3	0.83647	18303.5	0.83909
BMI	sCCA3	PIxexDG	418	194	18721	18691	18579.1	0.767893	18548.1	0.769527
BMI	sCCA3	PIxexPFC1	359	157	12246	12222	12251.8	0.483455	12219.6	0.504473
BMI	sCCA3	PIxexPFC2	313	150	11175	11157	11284.7	0.230857	11262.5	0.239383
BMI	sCCA3	PIxGABA1	379	155	11935	11912	11885	0.625471	11862.8	0.623669
BMI	sCCA3	PIxGABA2	467	187	17391	17354	17424.8	0.426769	17374.8	0.454208
BMI	sCCA3	PIxMG	366	213	22578	22538	22399	0.799929	22345.2	0.817944
BMI	sCCA3	PIxNSC	269	141	9870	9858	9993.49	0.189425	9977.67	0.196673
BMI	sCCA3	PIxODC1	364	211	22155	22124	22052	0.686821	22017.1	0.69355
BMI	sCCA3	PIxOPC	349	163	13203	13177	13349.4	0.183645	13329.8	0.173121
cAUDIT	cortex.PEC	ASC1	1800	1211	732655	731541	730736	0.943635	729555	0.949775
cAUDIT	cortex.PEC	ASC2	1817	1184	700336	699226	699080	0.855714	698005	0.849123
cAUDIT	cortex.PEC	END	1888	1107	612171	611101	613639	0.0923839	612720	0.0716262
cAUDIT	cortex.PEC	exCA1	1812	1170	683865	682767	685793	0.0496822	684644	0.054181
cAUDIT	cortex.PEC	exCA3	1788	1159	671061	669973	672537	0.101418	671472	0.0976771
cAUDIT	cortex.PEC	exDG	1766	1151	661825	660829	662465	0.288795	661428	0.300923
cAUDIT	cortex.PEC	exPFC1	1748	1186	702705	701790	700081	0.986654	699177	0.986379
cAUDIT	cortex.PEC	exPFC2	1754	1208	729028	728078	727048	0.949549	726102	0.949302
cAUDIT	cortex.PEC	GABA1	1804	1148	658378	657433	659777	0.111492	658867	0.105605
cAUDIT	cortex.PEC	GABA2	1817	1120	626640	625787	627701	0.171551	626854	0.170097
cAUDIT	cortex.PEC	MG	1819	1163	675703	674667	675271	0.644572	674190	0.659007
cAUDIT	cortex.PEC	NSC	1801	1179	694431	693449	694273	0.552952	693366	0.527728
cAUDIT	cortex.PEC	ODC1	1757	1201	720600	719572	721928	0.134369	720908	0.132693
cAUDIT	cortex.PEC	OPC	1800	1140	649230	648437	651114	0.0492411	650335	0.0479327
cAUDIT	cortex.PEC	PI_genes	3524	1742	1516411	1514376	1.51977e+06	0.0270014	1.5176e+06	0.0322478
cAUDIT	cortex.PEC	PIxASC1	344	172	14706	14688	14861.9	0.181506	14825.8	0.210249
cAUDIT	cortex.PEC	PIxASC2	325	150	11175	11166	11235.8	0.340812	11227.2	0.339627
cAUDIT	cortex.PEC	PIxEND	390	204	20706	20679	20723.8	0.463776	20706.4	0.44522
cAUDIT	cortex.PEC	PIxexCA1	433	230	26335	26302	26444.3	0.316183	26420.8	0.301567
cAUDIT	cortex.PEC	PIxexCA3	416	232	26796	26754	26563.9	0.842005	26522.6	0.841434
cAUDIT	cortex.PEC	PIxexDG	441	239	28441	28401	28522.6	0.365199	28478.6	0.371378
cAUDIT	cortex.PEC	PIxexPFC1	363	216	23220	23199	23285.1	0.380236	23261.7	0.384379
cAUDIT	cortex.PEC	PIxexPFC2	315	214	22791	22770	22566.7	0.853395	22544	0.855342
cAUDIT	cortex.PEC	PIxGABA1	401	198	19503	19481	19521.3	0.461781	19497.5	0.465404
cAUDIT	cortex.PEC	PIxGABA2	503	247	30381	30345	30490.4	0.327814	30451.3	0.332289
cAUDIT	cortex.PEC	PIxMG	373	203	20503	20473	20572.9	0.363949	20538.3	0.372386
cAUDIT	cortex.PEC	PIxNSC	291	144	10296	10284	10561.9	0.0327563	10552	0.0316484
cAUDIT	cortex.PEC	PIxODC1	372	234	27261	27233	27378	0.307342	27334.3	0.331325
cAUDIT	cortex.PEC	PIxOPC	387	181	16290	16271	16374.1	0.319561	16352.5	0.324637
cAUDIT	sCCA1	ASC1	1646	1095	598965	597880	599834	0.213644	598790	0.202658
cAUDIT	sCCA1	ASC2	1668	1087	589155	588056	588921	0.584934	587878	0.564975
cAUDIT	sCCA1	END	1828	1270	805815	803930	805786	0.508843	803883	0.514715
cAUDIT	sCCA1	exCA1	1622	918	420903	419929	418468	0.996074	417498	0.996064
cAUDIT	sCCA1	exCA3	1620	913	416328	415355	416440	0.450755	415411	0.475398
cAUDIT	sCCA1	exDG	1595	901	405450	404604	404900	0.72914	404084	0.718096
cAUDIT	sCCA1	exPFC1	1546	816	332520	331863	332773	0.377691	332125	0.373542
cAUDIT	sCCA1	exPFC2	1574	906	409965	409195	409940	0.510812	409153	0.518112
cAUDIT	sCCA1	GABA1	1627	911	413595	412833	414197	0.254019	413424	0.257481
cAUDIT	sCCA1	GABA2	1694	907	410871	410068	413143	0.00617492	412318	0.00655235
cAUDIT	sCCA1	MG	1700	1249	779376	777995	782294	0.00976972	780943	0.00912525
cAUDIT	sCCA1	NSC	1703	1157	668746	667461	669941	0.150724	668619	0.158106
cAUDIT	sCCA1	ODC1	1637	1164	676866	675748	678627	0.0652119	677445	0.0722318
cAUDIT	sCCA1	OPC	1673	1022	521731	520962	521442	0.610976	520777	0.571751
cAUDIT	sCCA1	PI_genes	3373	2015	2029105	2025550	2.03039e+06	0.260909	2.02679e+06	0.268865
cAUDIT	sCCA1	PIxASC1	323	182	16471	16443	16668.6	0.138317	16634.5	0.145526
cAUDIT	sCCA1	PIxASC2	300	164	13366	13351	13318.3	0.613308	13300.9	0.618982
cAUDIT	sCCA1	PIxEND	363	243	29403	29352	29067	0.91746	28996.2	0.929441
cAUDIT	sCCA1	PIxexCA1	403	215	23005	22966	22863.6	0.744524	22825.2	0.743788
cAUDIT	sCCA1	PIxexCA3	405	219	23871	23831	23911.6	0.425094	23858.5	0.448601
cAUDIT	sCCA1	PIxexDG	418	225	25200	25151	25062.3	0.729631	24997	0.753285
cAUDIT	sCCA1	PIxexPFC1	359	171	14535	14504	14404.1	0.778206	14382.6	0.761397
cAUDIT	sCCA1	PIxexPFC2	313	170	14365	14341	14155.7	0.89197	14139	0.883797
cAUDIT	sCCA1	PIxGABA1	379	176	15400	15372	15281.5	0.749515	15246.6	0.762188
cAUDIT	sCCA1	PIxGABA2	467	223	24753	24701	24199.3	0.993868	24137.5	0.994639
cAUDIT	sCCA1	PIxMG	366	241	28920	28876	29169.5	0.14978	29135.2	0.140445
cAUDIT	sCCA1	PIxNSC	269	165	13530	13511	13495.1	0.582579	13479.9	0.573557
cAUDIT	sCCA1	PIxODC1	364	244	29646	29605	29940	0.113875	29904.2	0.109683
cAUDIT	sCCA1	PIxOPC	349	184	16836	16805	16794.5	0.588184	16773.2	0.567367
cAUDIT	sCCA2	ASC1	1646	1047	547581	546590	547925	0.3711	546909	0.379957
cAUDIT	sCCA2	ASC2	1668	1038	538203	537187	536237	0.971072	535253	0.969053
cAUDIT	sCCA2	END	1828	1204	724206	722531	724078	0.541971	722488	0.513973
cAUDIT	sCCA2	exCA1	1622	884	390286	389384	389632	0.770436	388777	0.753998
cAUDIT	sCCA2	exCA3	1620	875	382375	381519	381743	0.764905	380862	0.774068
cAUDIT	sCCA2	exDG	1595	855	365085	364382	365447	0.335597	364759	0.329358
cAUDIT	sCCA2	exPFC1	1546	781	304590	303999	305171	0.228376	304567	0.233005
cAUDIT	sCCA2	exPFC2	1574	867	375411	374701	373425	0.989138	372667	0.99068
cAUDIT	sCCA2	GABA1	1627	869	377146	376454	377398	0.385534	376688	0.393265
cAUDIT	sCCA2	GABA2	1694	858	367653	366945	368795	0.0915844	368094	0.0899323
cAUDIT	sCCA2	MG	1700	1181	696790	695567	697000	0.429248	695817	0.416018
cAUDIT	sCCA2	NSC	1703	1101	605550	604409	605558	0.496932	604422	0.495083
cAUDIT	sCCA2	ODC1	1637	1096	600060	599089	600569	0.321046	599593	0.322342
cAUDIT	sCCA2	OPC	1673	966	466095	465395	467345	0.0977757	466662	0.094573
cAUDIT	sCCA2	PI_genes	3373	1861	1728870	1725851	1.72912e+06	0.445473	1.72604e+06	0.458337
cAUDIT	sCCA2	PIxASC1	323	171	14535	14509	14625.7	0.296355	14598.5	0.29857
cAUDIT	sCCA2	PIxASC2	300	156	12090	12076	12104.3	0.461692	12092	0.457263
cAUDIT	sCCA2	PIxEND	363	228	25878	25833	26011.4	0.278111	25972	0.269747
cAUDIT	sCCA2	PIxexCA1	403	202	20301	20267	20186.3	0.714576	20163.2	0.696101
cAUDIT	sCCA2	PIxexCA3	405	205	20910	20874	20975.4	0.373524	20936.8	0.378174
cAUDIT	sCCA2	PIxexDG	418	202	20301	20272	20277.1	0.545978	20248.5	0.545183
cAUDIT	sCCA2	PIxexPFC1	359	159	12561	12535	12622.9	0.346811	12591.5	0.359319
cAUDIT	sCCA2	PIxexPFC2	313	158	12403	12384	12389.2	0.533175	12374.8	0.521747
cAUDIT	sCCA2	PIxGABA1	379	165	13530	13504	13623.6	0.283744	13605.6	0.26738
cAUDIT	sCCA2	PIxGABA2	467	199	19701	19662	19386.7	0.943917	19349.2	0.943221
cAUDIT	sCCA2	PIxMG	366	222	24531	24496	24424.4	0.684094	24388.9	0.684934
cAUDIT	sCCA2	PIxNSC	269	152	11476	11462	11350.9	0.795188	11340.9	0.78756
cAUDIT	sCCA2	PIxODC1	364	227	25651	25614	25778.8	0.285571	25735.5	0.295005
cAUDIT	sCCA2	PIxOPC	349	169	14196	14171	14271.4	0.326052	14255.3	0.307299
cAUDIT	sCCA3	ASC1	1646	1009	508536	507615	509526	0.163222	508570	0.171573
cAUDIT	sCCA3	ASC2	1668	992	491536	490628	490661	0.811217	489753	0.81146
cAUDIT	sCCA3	END	1828	1150	660675	659145	661745	0.175941	660239	0.170229
cAUDIT	sCCA3	exCA1	1622	834	347361	346553	347904	0.257085	347032	0.282167
cAUDIT	sCCA3	exCA3	1620	843	354903	354075	354278	0.770933	353405	0.786932
cAUDIT	sCCA3	exDG	1595	828	342378	341712	341935	0.703606	341238	0.716512
cAUDIT	sCCA3	exPFC1	1546	763	290703	290126	290854	0.421284	290286	0.416597
cAUDIT	sCCA3	exPFC2	1574	844	355746	355089	354159	0.970209	353476	0.972301
cAUDIT	sCCA3	GABA1	1627	840	351541	350896	352388	0.15631	351736	0.157907
cAUDIT	sCCA3	GABA2	1694	835	348195	347516	350284	0.00622331	349627	0.00573488
cAUDIT	sCCA3	MG	1700	1133	641278	640115	642299	0.183552	641217	0.16512
cAUDIT	sCCA3	NSC	1703	1054	554931	553938	555563	0.27425	554570	0.273818
cAUDIT	sCCA3	ODC1	1637	1056	557040	556112	556720	0.619003	555849	0.598267
cAUDIT	sCCA3	OPC	1673	940	441330	440652	442297	0.151701	441609	0.153946
cAUDIT	sCCA3	PI_genes	3373	1766	1558495	1555797	1.56235e+06	0.0145876	1.55973e+06	0.0129445
cAUDIT	sCCA3	PIxASC1	323	155	11935	11915	12052	0.223936	12031.7	0.224306
cAUDIT	sCCA3	PIxASC2	300	138	9453	9441	9388.95	0.677973	9377.13	0.677615
cAUDIT	sCCA3	PIxEND	363	218	23653	23613	23853.1	0.178625	23826.3	0.163167
cAUDIT	sCCA3	PIxexCA1	403	184	16836	16802	16758.9	0.661673	16713.6	0.684197
cAUDIT	sCCA3	PIxexCA3	405	193	18528	18494	18979.9	0.00984089	18920.9	0.0136784
cAUDIT	sCCA3	PIxexDG	418	194	18721	18691	18788.7	0.362027	18754.8	0.369494
cAUDIT	sCCA3	PIxexPFC1	359	157	12246	12222	12091.5	0.838275	12073.6	0.828639
cAUDIT	sCCA3	PIxexPFC2	313	150	11175	11157	10869.9	0.980057	10856.9	0.978464
cAUDIT	sCCA3	PIxGABA1	379	155	11935	11912	12111.4	0.127084	12075.2	0.145282
cAUDIT	sCCA3	PIxGABA2	467	187	17391	17354	17506.6	0.266884	17459.1	0.285497
cAUDIT	sCCA3	PIxMG	366	213	22578	22538	22710.3	0.266077	22679.6	0.251873
cAUDIT	sCCA3	PIxNSC	269	141	9870	9858	9818.05	0.642693	9806.96	0.640336
cAUDIT	sCCA3	PIxODC1	364	211	22155	22124	22457.6	0.0757457	22440	0.0670329
cAUDIT	sCCA3	PIxOPC	349	163	13203	13177	13231.8	0.428144	13216.6	0.402194
cpdL10H20	cortex.PEC	ASC1	1800	1211	732655	731541	733243	0.313423	732099	0.322092
cpdL10H20	cortex.PEC	ASC2	1817	1184	700336	699226	699204	0.830494	698162	0.815755
cpdL10H20	cortex.PEC	END	1888	1107	612171	611101	610649	0.91558	609476	0.92924
cpdL10H20	cortex.PEC	exCA1	1812	1170	683865	682767	687627	0.000659703	686536	0.000640228
cpdL10H20	cortex.PEC	exCA3	1788	1159	671061	669973	675073	0.00027305	673896	0.000358151
cpdL10H20	cortex.PEC	exDG	1766	1151	661825	660829	659736	0.965409	658692	0.968574
cpdL10H20	cortex.PEC	exPFC1	1748	1186	702705	701790	700801	0.945995	699782	0.955031
cpdL10H20	cortex.PEC	exPFC2	1754	1208	729028	728078	728995	0.510557	727927	0.549655
cpdL10H20	cortex.PEC	GABA1	1804	1148	658378	657433	660537	0.0300391	659548	0.0326623
cpdL10H20	cortex.PEC	GABA2	1817	1120	626640	625787	630664	0.000166767	629757	0.000198444
cpdL10H20	cortex.PEC	MG	1819	1163	675703	674667	676828	0.166524	675766	0.172047
cpdL10H20	cortex.PEC	NSC	1801	1179	694431	693449	695590	0.162702	694579	0.168666
cpdL10H20	cortex.PEC	ODC1	1757	1201	720600	719572	722158	0.097245	721092	0.102663
cpdL10H20	cortex.PEC	OPC	1800	1140	649230	648437	653590	6.72873e-05	652751	7.83983e-05
cpdL10H20	cortex.PEC	PI_genes	3524	1742	1516411	1514376	1.51477e+06	0.827284	1.51265e+06	0.839065
cpdL10H20	cortex.PEC	PIxASC1	344	172	14706	14688	14459.5	0.925318	14432.2	0.932876
cpdL10H20	cortex.PEC	PIxASC2	325	150	11175	11166	11208.6	0.409403	11195.9	0.419075
cpdL10H20	cortex.PEC	PIxEND	390	204	20706	20679	20606.3	0.687091	20560.4	0.719403
cpdL10H20	cortex.PEC	PIxexCA1	433	230	26335	26302	26096.6	0.850572	26067.3	0.846984
cpdL10H20	cortex.PEC	PIxexCA3	416	232	26796	26754	26480.9	0.913634	26440.9	0.912418
cpdL10H20	cortex.PEC	PIxexDG	441	239	28441	28401	28629.3	0.214631	28583.3	0.221863
cpdL10H20	cortex.PEC	PIxexPFC1	363	216	23220	23199	23563.2	0.056139	23527.9	0.0639159
cpdL10H20	cortex.PEC	PIxexPFC2	315	214	22791	22770	23151.4	0.0462372	23114.7	0.0536553
cpdL10H20	cortex.PEC	PIxGABA1	401	198	19503	19481	19438.3	0.62718	19412.1	0.63542
cpdL10H20	cortex.PEC	PIxGABA2	503	247	30381	30345	29970.9	0.952377	29926.3	0.955881
cpdL10H20	cortex.PEC	PIxMG	373	203	20503	20473	20448.4	0.605018	20417.7	0.606479
cpdL10H20	cortex.PEC	PIxNSC	291	144	10296	10284	10371.4	0.298543	10356.8	0.304577
cpdL10H20	cortex.PEC	PIxODC1	372	234	27261	27233	27430	0.2342	27395	0.243365
cpdL10H20	cortex.PEC	PIxOPC	387	181	16290	16271	16074.6	0.883985	16057.7	0.881746
cpdL10H20	sCCA1	ASC1	1646	1095	598965	597880	600431	0.0903516	599284	0.0996432
cpdL10H20	sCCA1	ASC2	1668	1087	589155	588056	588954	0.573334	587842	0.578049
cpdL10H20	sCCA1	END	1828	1270	805815	803930	807691	0.069832	805731	0.0778866
cpdL10H20	sCCA1	exCA1	1622	918	420903	419929	421113	0.40935	420086	0.431709
cpdL10H20	sCCA1	exCA3	1620	913	416328	415355	416104	0.596561	415043	0.633824
cpdL10H20	sCCA1	exDG	1595	901	405450	404604	405055	0.669199	404151	0.692383
cpdL10H20	sCCA1	exPFC1	1546	816	332520	331863	331649	0.857397	330917	0.877286
cpdL10H20	sCCA1	exPFC2	1574	906	409965	409195	410645	0.226229	409815	0.246302
cpdL10H20	sCCA1	GABA1	1627	911	413595	412833	413340	0.610313	412519	0.635075
cpdL10H20	sCCA1	GABA2	1694	907	410871	410068	411376	0.288592	410591	0.281759
cpdL10H20	sCCA1	MG	1700	1249	779376	777995	780671	0.149787	779252	0.156826
cpdL10H20	sCCA1	NSC	1703	1157	668746	667461	670559	0.0585566	669196	0.0666875
cpdL10H20	sCCA1	ODC1	1637	1164	676866	675748	676305	0.685054	675104	0.709933
cpdL10H20	sCCA1	OPC	1673	1022	521731	520962	525108	0.000484272	524321	0.00051129
cpdL10H20	sCCA1	PI_genes	3373	2015	2029105	2025550	2.03634e+06	0.00016729	2.0327e+06	0.000192277
cpdL10H20	sCCA1	PIxASC1	323	182	16471	16443	16646	0.167341	16616	0.169917
cpdL10H20	sCCA1	PIxASC2	300	164	13366	13351	13347.5	0.543482	13329.9	0.549675
cpdL10H20	sCCA1	PIxEND	363	243	29403	29352	29529.8	0.299869	29483.8	0.292588
cpdL10H20	sCCA1	PIxexCA1	403	215	23005	22966	23053.6	0.409163	23023.8	0.392667
cpdL10H20	sCCA1	PIxexCA3	405	219	23871	23831	23755.8	0.700209	23714.3	0.702815
cpdL10H20	sCCA1	PIxexDG	418	225	25200	25151	25082.1	0.699566	25019.4	0.720597
cpdL10H20	sCCA1	PIxexPFC1	359	171	14535	14504	14638.1	0.271809	14615.1	0.25645
cpdL10H20	sCCA1	PIxexPFC2	313	170	14365	14341	14498.6	0.214824	14476.9	0.210759
cpdL10H20	sCCA1	PIxGABA1	379	176	15400	15372	15107.8	0.952721	15074.1	0.956026
cpdL10H20	sCCA1	PIxGABA2	467	223	24753	24701	24749	0.505915	24694.9	0.509731
cpdL10H20	sCCA1	PIxMG	366	241	28920	28876	28846	0.61992	28822.4	0.587258
cpdL10H20	sCCA1	PIxNSC	269	165	13530	13511	13590.2	0.355996	13578.2	0.340064
cpdL10H20	sCCA1	PIxODC1	364	244	29646	29605	29462	0.774705	29420.8	0.77512
cpdL10H20	sCCA1	PIxOPC	349	184	16836	16805	16887.5	0.388207	16861	0.378855
cpdL10H20	sCCA2	ASC1	1646	1047	547581	546590	548445	0.204392	547384	0.223596
cpdL10H20	sCCA2	ASC2	1668	1038	538203	537187	538528	0.376816	537565	0.357479
cpdL10H20	sCCA2	END	1828	1204	724206	722531	724921	0.276062	723196	0.289836
cpdL10H20	sCCA2	exCA1	1622	884	390286	389384	390023	0.616756	389184	0.5895
cpdL10H20	sCCA2	exCA3	1620	875	382375	381519	382136	0.607631	381217	0.63498
cpdL10H20	sCCA2	exDG	1595	855	365085	364382	365808	0.198544	365102	0.199366
cpdL10H20	sCCA2	exPFC1	1546	781	304590	303999	304893	0.348842	304280	0.359047
cpdL10H20	sCCA2	exPFC2	1574	867	375411	374701	376583	0.0881873	375799	0.102338
cpdL10H20	sCCA2	GABA1	1627	869	377146	376454	377238	0.457589	376575	0.444066
cpdL10H20	sCCA2	GABA2	1694	858	367653	366945	367106	0.737902	366387	0.742466
cpdL10H20	sCCA2	MG	1700	1181	696790	695567	695594	0.844469	694366	0.845726
cpdL10H20	sCCA2	NSC	1703	1101	605550	604409	603184	0.984312	601930	0.988013
cpdL10H20	sCCA2	ODC1	1637	1096	600060	599089	599523	0.687683	598473	0.712945
cpdL10H20	sCCA2	OPC	1673	966	466095	465395	466557	0.315875	465890	0.303911
cpdL10H20	sCCA2	PI_genes	3373	1861	1728870	1725851	1.73031e+06	0.218514	1.72723e+06	0.229195
cpdL10H20	sCCA2	PIxASC1	323	171	14535	14509	14619.1	0.309916	14584.2	0.328212
cpdL10H20	sCCA2	PIxASC2	300	156	12090	12076	12138.5	0.376131	12130.6	0.361277
cpdL10H20	sCCA2	PIxEND	363	228	25878	25833	25826.7	0.588093	25780.5	0.5902
cpdL10H20	sCCA2	PIxexCA1	403	202	20301	20267	20680.7	0.0303309	20640.1	0.0324962
cpdL10H20	sCCA2	PIxexCA3	405	205	20910	20874	21024.9	0.286293	20981.4	0.298777
cpdL10H20	sCCA2	PIxexDG	418	202	20301	20272	20568.9	0.0922308	20533.7	0.0972766
cpdL10H20	sCCA2	PIxexPFC1	359	159	12561	12535	12653.5	0.278796	12624.5	0.285061
cpdL10H20	sCCA2	PIxexPFC2	313	158	12403	12384	12361.1	0.603306	12345.4	0.595226
cpdL10H20	sCCA2	PIxGABA1	379	165	13530	13504	13419.4	0.748537	13381	0.772314
cpdL10H20	sCCA2	PIxGABA2	467	199	19701	19662	20033.8	0.0473993	19975.6	0.0574747
cpdL10H20	sCCA2	PIxMG	366	222	24531	24496	24639.5	0.311289	24625.6	0.27839
cpdL10H20	sCCA2	PIxNSC	269	152	11476	11462	11494.9	0.448654	11472.8	0.469916
cpdL10H20	sCCA2	PIxODC1	364	227	25651	25614	25353	0.906215	25301.5	0.916735
cpdL10H20	sCCA2	PIxOPC	349	169	14196	14171	14148	0.61079	14118.2	0.62182
cpdL10H20	sCCA3	ASC1	1646	1009	508536	507615	508899	0.359083	507955	0.367675
cpdL10H20	sCCA3	ASC2	1668	992	491536	490628	492125	0.276144	491320	0.242218
cpdL10H20	sCCA3	END	1828	1150	660675	659145	660020	0.715488	658485	0.717097
cpdL10H20	sCCA3	exCA1	1622	834	347361	346553	348993	0.0252772	348165	0.0265513
cpdL10H20	sCCA3	exCA3	1620	843	354903	354075	355563	0.216586	354689	0.232589
cpdL10H20	sCCA3	exDG	1595	828	342378	341712	343382	0.11248	342697	0.116831
cpdL10H20	sCCA3	exPFC1	1546	763	290703	290126	291494	0.149787	290902	0.154216
cpdL10H20	sCCA3	exPFC2	1574	844	355746	355089	356506	0.183609	355762	0.212284
cpdL10H20	sCCA3	GABA1	1627	840	351541	350896	349921	0.973429	349190	0.979299
cpdL10H20	sCCA3	GABA2	1694	835	348195	347516	348497	0.358593	347820	0.357313
cpdL10H20	sCCA3	MG	1700	1133	641278	640115	642352	0.171503	641102	0.19139
cpdL10H20	sCCA3	NSC	1703	1054	554931	553938	554391	0.695823	553254	0.741939
cpdL10H20	sCCA3	ODC1	1637	1056	557040	556112	557689	0.26916	556675	0.296492
cpdL10H20	sCCA3	OPC	1673	940	441330	440652	443011	0.0369158	442278	0.0417657
cpdL10H20	sCCA3	PI_genes	3373	1766	1558495	1555797	1.56079e+06	0.0969134	1.55804e+06	0.101666
cpdL10H20	sCCA3	PIxASC1	323	155	11935	11915	12057.5	0.213381	12043.1	0.202901
cpdL10H20	sCCA3	PIxASC2	300	138	9453	9441	9373.71	0.716812	9362.85	0.714109
cpdL10H20	sCCA3	PIxEND	363	218	23653	23613	23828.6	0.209378	23793.2	0.203244
cpdL10H20	sCCA3	PIxexCA1	403	184	16836	16802	16667.9	0.820052	16646	0.802285
cpdL10H20	sCCA3	PIxexCA3	405	193	18528	18494	18240.3	0.933074	18206.7	0.932951
cpdL10H20	sCCA3	PIxexDG	418	194	18721	18691	18651.3	0.639454	18628.1	0.626314
cpdL10H20	sCCA3	PIxexPFC1	359	157	12246	12222	12523.9	0.0386263	12505.2	0.0357802
cpdL10H20	sCCA3	PIxexPFC2	313	150	11175	11157	11281.6	0.237312	11268	0.228059
cpdL10H20	sCCA3	PIxGABA1	379	155	11935	11912	11874	0.652219	11853.1	0.647337
cpdL10H20	sCCA3	PIxGABA2	467	187	17391	17354	17303	0.680431	17275.5	0.662152
cpdL10H20	sCCA3	PIxMG	366	213	22578	22538	22319.3	0.888539	22284.8	0.883775
cpdL10H20	sCCA3	PIxNSC	269	141	9870	9858	9842.87	0.574768	9829.73	0.577988
cpdL10H20	sCCA3	PIxODC1	364	211	22155	22124	22253.9	0.318417	22220.5	0.322302
cpdL10H20	sCCA3	PIxOPC	349	163	13203	13177	13369.9	0.152219	13337.3	0.161741
dpw	cortex.PEC	ASC1	1800	1211	732655	731541	733616	0.213461	732381	0.243679
dpw	cortex.PEC	ASC2	1817	1184	700336	699226	698994	0.871585	697756	0.893191
dpw	cortex.PEC	END	1888	1107	612171	611101	611008	0.853482	609862	0.868836
dpw	cortex.PEC	exCA1	1812	1170	683865	682767	685792	0.0498435	684724	0.0471334
dpw	cortex.PEC	exCA3	1788	1159	671061	669973	672293	0.143796	671233	0.138168
dpw	cortex.PEC	exDG	1766	1151	661825	660829	660637	0.849173	659583	0.860895
dpw	cortex.PEC	exPFC1	1748	1186	702705	701790	705124	0.0207216	704240	0.0194266
dpw	cortex.PEC	exPFC2	1754	1208	729028	728078	729436	0.367591	728506	0.361294
dpw	cortex.PEC	GABA1	1804	1148	658378	657433	659722	0.120834	658786	0.118995
dpw	cortex.PEC	GABA2	1817	1120	626640	625787	628647	0.0366236	627775	0.0378942
dpw	cortex.PEC	MG	1819	1163	675703	674667	674840	0.770922	673799	0.772467
dpw	cortex.PEC	NSC	1801	1179	694431	693449	694043	0.62874	693081	0.622398
dpw	cortex.PEC	ODC1	1757	1201	720600	719572	721136	0.327547	720042	0.347497
dpw	cortex.PEC	OPC	1800	1140	649230	648437	649993	0.251549	649156	0.263682
dpw	cortex.PEC	PI_genes	3524	1742	1516411	1514376	1.51717e+06	0.331791	1.51502e+06	0.355061
dpw	cortex.PEC	PIxASC1	344	172	14706	14688	14613.8	0.703653	14589.2	0.71703
dpw	cortex.PEC	PIxASC2	325	150	11175	11166	11254.8	0.295606	11244.1	0.29958
dpw	cortex.PEC	PIxEND	390	204	20706	20679	20708.7	0.493395	20687.7	0.481717
dpw	cortex.PEC	PIxexCA1	433	230	26335	26302	26356.4	0.461629	26330.3	0.449714
dpw	cortex.PEC	PIxexCA3	416	232	26796	26754	26803.7	0.485539	26761.6	0.485662
dpw	cortex.PEC	PIxexDG	441	239	28441	28401	28760.6	0.0904571	28726.6	0.0863492
dpw	cortex.PEC	PIxexPFC1	363	216	23220	23199	23300.2	0.353968	23279	0.354131
dpw	cortex.PEC	PIxexPFC2	315	214	22791	22770	22354.6	0.980027	22336.2	0.97947
dpw	cortex.PEC	PIxGABA1	401	198	19503	19481	19739.9	0.115435	19694.7	0.139648
dpw	cortex.PEC	PIxGABA2	503	247	30381	30345	30557.4	0.236766	30535.7	0.219153
dpw	cortex.PEC	PIxMG	373	203	20503	20473	20359.3	0.7605	20342.5	0.739943
dpw	cortex.PEC	PIxNSC	291	144	10296	10284	10580.7	0.0243977	10575.3	0.0218499
dpw	cortex.PEC	PIxODC1	372	234	27261	27233	27745.5	0.0194248	27725.5	0.0178402
dpw	cortex.PEC	PIxOPC	387	181	16290	16271	16390.8	0.287308	16358.9	0.31206
dpw	sCCA1	ASC1	1646	1095	598965	597880	599618	0.275161	598433	0.306401
dpw	sCCA1	ASC2	1668	1087	589155	588056	588930	0.581967	587706	0.626376
dpw	sCCA1	END	1828	1270	805815	803930	807671	0.0720056	805521	0.104865
dpw	sCCA1	exCA1	1622	918	420903	419929	422514	0.0396534	421515	0.0419374
dpw	sCCA1	exCA3	1620	913	416328	415355	416665	0.355627	415718	0.344885
dpw	sCCA1	exDG	1595	901	405450	404604	406406	0.144323	405485	0.163774
dpw	sCCA1	exPFC1	1546	816	332520	331863	334241	0.0175529	333575	0.0179343
dpw	sCCA1	exPFC2	1574	906	409965	409195	410201	0.396934	409389	0.414726
dpw	sCCA1	GABA1	1627	911	413595	412833	413185	0.67358	412389	0.687309
dpw	sCCA1	GABA2	1694	907	410871	410068	411789	0.155564	410935	0.169245
dpw	sCCA1	MG	1700	1249	779376	777995	777799	0.89677	776430	0.895265
dpw	sCCA1	NSC	1703	1157	668746	667461	671328	0.0128565	669952	0.0156337
dpw	sCCA1	ODC1	1637	1164	676866	675748	676313	0.682705	675128	0.702916
dpw	sCCA1	OPC	1673	1022	521731	520962	524163	0.00871866	523432	0.00784119
dpw	sCCA1	PI_genes	3373	2015	2029105	2025550	2.02789e+06	0.727517	2.02398e+06	0.782919
dpw	sCCA1	PIxASC1	323	182	16471	16443	16804.9	0.0335411	16766.9	0.0377087
dpw	sCCA1	PIxASC2	300	164	13366	13351	13756.2	0.00894391	13734.6	0.00991767
dpw	sCCA1	PIxEND	363	243	29403	29352	29445.6	0.429171	29385.5	0.443919
dpw	sCCA1	PIxexCA1	403	215	23005	22966	23046.9	0.42144	23005.8	0.425216
dpw	sCCA1	PIxexCA3	405	219	23871	23831	23861.8	0.515603	23811.9	0.533594
dpw	sCCA1	PIxexDG	418	225	25200	25151	25398.1	0.188553	25345.9	0.192168
dpw	sCCA1	PIxexPFC1	359	171	14535	14504	14584.1	0.385324	14560.2	0.369491
dpw	sCCA1	PIxexPFC2	313	170	14365	14341	14283.3	0.684112	14266.2	0.669487
dpw	sCCA1	PIxGABA1	379	176	15400	15372	15182.8	0.89248	15159.5	0.887528
dpw	sCCA1	PIxGABA2	467	223	24753	24701	24552.9	0.815571	24502.6	0.813796
dpw	sCCA1	PIxMG	366	241	28920	28876	28958.4	0.435485	28928.4	0.412632
dpw	sCCA1	PIxNSC	269	165	13530	13511	13402.2	0.780955	13386.1	0.775821
dpw	sCCA1	PIxODC1	364	244	29646	29605	29898.1	0.150312	29863	0.14462
dpw	sCCA1	PIxOPC	349	184	16836	16805	16826.6	0.518968	16801.5	0.506265
dpw	sCCA2	ASC1	1646	1047	547581	546590	547479	0.538657	546317	0.602708
dpw	sCCA2	ASC2	1668	1038	538203	537187	537273	0.814978	536090	0.855073
dpw	sCCA2	END	1828	1204	724206	722531	725366	0.16755	723568	0.194069
dpw	sCCA2	exCA1	1622	884	390286	389384	391271	0.13239	390309	0.147367
dpw	sCCA2	exCA3	1620	875	382375	381519	384232	0.0169512	383408	0.0153777
dpw	sCCA2	exDG	1595	855	365085	364382	366020	0.136846	365208	0.166647
dpw	sCCA2	exPFC1	1546	781	304590	303999	305764	0.0663875	305140	0.0719098
dpw	sCCA2	exPFC2	1574	867	375411	374701	375643	0.394219	374921	0.399349
dpw	sCCA2	GABA1	1627	869	377146	376454	376976	0.577128	376259	0.588648
dpw	sCCA2	GABA2	1694	858	367653	366945	367208	0.697958	366410	0.733556
dpw	sCCA2	MG	1700	1181	696790	695567	693877	0.993259	692623	0.993777
dpw	sCCA2	NSC	1703	1101	605550	604409	607629	0.0295274	606410	0.0344636
dpw	sCCA2	ODC1	1637	1096	600060	599089	598766	0.881331	597787	0.882861
dpw	sCCA2	OPC	1673	966	466095	465395	466708	0.262573	465939	0.286304
dpw	sCCA2	PI_genes	3373	1861	1728870	1725851	1.73105e+06	0.120239	1.72796e+06	0.127649
dpw	sCCA2	PIxASC1	323	171	14535	14509	14573.7	0.408782	14546.7	0.41093
dpw	sCCA2	PIxASC2	300	156	12090	12076	12177.4	0.28609	12162	0.288998
dpw	sCCA2	PIxEND	363	228	25878	25833	26210.9	0.0721615	26165.7	0.0720863
dpw	sCCA2	PIxexCA1	403	202	20301	20267	20372.6	0.360052	20346.6	0.345273
dpw	sCCA2	PIxexCA3	405	205	20910	20874	21129.4	0.141779	21092.9	0.142127
dpw	sCCA2	PIxexDG	418	202	20301	20272	20631.7	0.0509691	20601.6	0.0513973
dpw	sCCA2	PIxexPFC1	359	159	12561	12535	12650.8	0.2846	12629.8	0.273759
dpw	sCCA2	PIxexPFC2	313	158	12403	12384	12541.3	0.189678	12531.3	0.174566
dpw	sCCA2	PIxGABA1	379	165	13530	13504	13649.4	0.233348	13609.1	0.260489
dpw	sCCA2	PIxGABA2	467	199	19701	19662	19743	0.414947	19699	0.424722
dpw	sCCA2	PIxMG	366	222	24531	24496	24560.7	0.44553	24536.9	0.425473
dpw	sCCA2	PIxNSC	269	152	11476	11462	11658.9	0.114049	11647.7	0.110431
dpw	sCCA2	PIxODC1	364	227	25651	25614	25431.6	0.833589	25405.8	0.821067
dpw	sCCA2	PIxOPC	349	169	14196	14171	14138.1	0.63303	14106.7	0.647413
dpw	sCCA3	ASC1	1646	1009	508536	507615	509601	0.145487	508608	0.162211
dpw	sCCA3	ASC2	1668	992	491536	490628	491975	0.328931	490947	0.37349
dpw	sCCA3	END	1828	1150	660675	659145	661644	0.199489	659969	0.236309
dpw	sCCA3	exCA1	1622	834	347361	346553	348187	0.160895	347328	0.175853
dpw	sCCA3	exCA3	1620	843	354903	354075	355779	0.149232	354959	0.146854
dpw	sCCA3	exDG	1595	828	342378	341712	342819	0.297019	342093	0.322397
dpw	sCCA3	exPFC1	1546	763	290703	290126	291069	0.31545	290523	0.301062
dpw	sCCA3	exPFC2	1574	844	355746	355089	356214	0.289181	355517	0.305714
dpw	sCCA3	GABA1	1627	840	351541	350896	351407	0.563288	350719	0.583171
dpw	sCCA3	GABA2	1694	835	348195	347516	349140	0.128833	348394	0.146206
dpw	sCCA3	MG	1700	1133	641278	640115	642346	0.172782	641159	0.178007
dpw	sCCA3	NSC	1703	1054	554931	553938	556802	0.0380017	555746	0.0430683
dpw	sCCA3	ODC1	1637	1056	557040	556112	557216	0.433718	556244	0.44988
dpw	sCCA3	OPC	1673	940	441330	440652	442630	0.0833755	441920	0.0885132
dpw	sCCA3	PI_genes	3373	1766	1558495	1555797	1.55549e+06	0.955511	1.55258e+06	0.965877
dpw	sCCA3	PIxASC1	323	155	11935	11915	11678.6	0.952296	11663.1	0.949424
dpw	sCCA3	PIxASC2	300	138	9453	9441	9348.68	0.775376	9341.12	0.765647
dpw	sCCA3	PIxEND	363	218	23653	23613	23762.6	0.306281	23731.7	0.29171
dpw	sCCA3	PIxexCA1	403	184	16836	16802	16662.4	0.827866	16627.3	0.829658
dpw	sCCA3	PIxexCA3	405	193	18528	18494	18390.5	0.761912	18355.3	0.764146
dpw	sCCA3	PIxexDG	418	194	18721	18691	18936	0.133423	18899.8	0.140173
dpw	sCCA3	PIxexPFC1	359	157	12246	12222	12209.1	0.591614	12183.5	0.595649
dpw	sCCA3	PIxexPFC2	313	150	11175	11157	11278.4	0.243917	11249.1	0.267928
dpw	sCCA3	PIxGABA1	379	155	11935	11912	11921.4	0.533364	11902.3	0.523325
dpw	sCCA3	PIxGABA2	467	187	17391	17354	17473.7	0.327616	17437.8	0.32531
dpw	sCCA3	PIxMG	366	213	22578	22538	22622.5	0.415903	22578.3	0.423559
dpw	sCCA3	PIxNSC	269	141	9870	9858	9745.55	0.811854	9731.44	0.816071
dpw	sCCA3	PIxODC1	364	211	22155	22124	22307.8	0.233447	22277.8	0.231834
dpw	sCCA3	PIxOPC	349	163	13203	13177	13406.8	0.105275	13380.5	0.105374
gad	cortex.PEC	ASC1	1800	1211	732655	731541	735636	0.00694864	734530	0.00678825
gad	cortex.PEC	ASC2	1817	1184	700336	699226	701805	0.107339	700701	0.106135
gad	cortex.PEC	END	1888	1107	612171	611101	611326	0.777357	610311	0.762591
gad	cortex.PEC	exCA1	1812	1170	683865	682767	682516	0.875715	681537	0.853769
gad	cortex.PEC	exCA3	1788	1159	671061	669973	670979	0.527964	669955	0.505821
gad	cortex.PEC	exDG	1766	1151	661825	660829	661172	0.714775	660201	0.707506
gad	cortex.PEC	exPFC1	1748	1186	702705	701790	702387	0.605616	701515	0.591491
gad	cortex.PEC	exPFC2	1754	1208	729028	728078	728524	0.661602	727566	0.664035
gad	cortex.PEC	GABA1	1804	1148	658378	657433	657309	0.824301	656425	0.810197
gad	cortex.PEC	GABA2	1817	1120	626640	625787	626842	0.428148	625949	0.442357
gad	cortex.PEC	MG	1819	1163	675703	674667	675850	0.449357	674896	0.421776
gad	cortex.PEC	NSC	1801	1179	694431	693449	693241	0.843606	692226	0.850465
gad	cortex.PEC	ODC1	1757	1201	720600	719572	721418	0.247802	720343	0.260221
gad	cortex.PEC	OPC	1800	1140	649230	648437	646458	0.992568	645684	0.992244
gad	cortex.PEC	PI_genes	3524	1742	1516411	1514376	1.51791e+06	0.195299	1.51585e+06	0.199098
gad	cortex.PEC	PIxASC1	344	172	14706	14688	14666.5	0.589629	14652.8	0.57982
gad	cortex.PEC	PIxASC2	325	150	11175	11166	11225.5	0.36638	11214	0.372459
gad	cortex.PEC	PIxEND	390	204	20706	20679	20746.7	0.419593	20721.1	0.416764
gad	cortex.PEC	PIxexCA1	433	230	26335	26302	26026.1	0.911232	25991.9	0.912226
gad	cortex.PEC	PIxexCA3	416	232	26796	26754	26993.4	0.196745	26951.8	0.196054
gad	cortex.PEC	PIxexDG	441	239	28441	28401	28008.4	0.965653	27965.9	0.966533
gad	cortex.PEC	PIxexPFC1	363	216	23220	23199	23213.6	0.510532	23190.7	0.514108
gad	cortex.PEC	PIxexPFC2	315	214	22791	22770	22757.3	0.561483	22733.7	0.566332
gad	cortex.PEC	PIxGABA1	401	198	19503	19481	19078.8	0.984617	19056.9	0.984659
gad	cortex.PEC	PIxGABA2	503	247	30381	30345	30275.7	0.664564	30236.4	0.669519
gad	cortex.PEC	PIxMG	373	203	20503	20473	20738.3	0.12287	20706.2	0.124742
gad	cortex.PEC	PIxNSC	291	144	10296	10284	10457.9	0.129865	10445.9	0.129721
gad	cortex.PEC	PIxODC1	372	234	27261	27233	27482.9	0.170951	27464	0.161122
gad	cortex.PEC	PIxOPC	387	181	16290	16271	16346	0.376929	16328.8	0.373032
gad	sCCA1	ASC1	1646	1095	598965	597880	598728	0.585481	597689	0.568998
gad	sCCA1	ASC2	1668	1087	590241	589133	590230	0.503915	589200	0.475074
gad	sCCA1	END	1828	1270	805815	803930	803993	0.924447	802122	0.923104
gad	sCCA1	exCA1	1622	918	420903	419929	420710	0.582834	419719	0.590563
gad	sCCA1	exCA3	1620	913	416328	415355	415757	0.734126	414759	0.743244
gad	sCCA1	exDG	1595	901	405450	404604	406312	0.169282	405471	0.167466
gad	sCCA1	exPFC1	1546	816	332520	331863	331037	0.965641	330315	0.971453
gad	sCCA1	exPFC2	1574	906	409965	409195	408971	0.863975	408153	0.875393
gad	sCCA1	GABA1	1627	911	414505	413738	413053	0.944792	412208	0.953846
gad	sCCA1	GABA2	1694	907	410871	410068	411353	0.297306	410427	0.345824
gad	sCCA1	MG	1700	1249	779376	777995	775724	0.9983	774368	0.998204
gad	sCCA1	NSC	1703	1157	668746	667461	669400	0.28571	668072	0.298304
gad	sCCA1	ODC1	1637	1164	676866	675748	675731	0.835411	674552	0.848297
gad	sCCA1	OPC	1673	1022	521731	520962	521512	0.584575	520778	0.571453
gad	sCCA1	PI_genes	3373	2015	2029105	2025550	2.02547e+06	0.964502	2.0218e+06	0.968881
gad	sCCA1	PIxASC1	323	182	16471	16443	16733.3	0.0747951	16695	0.0828322
gad	sCCA1	PIxASC2	300	164	13366	13351	13453.9	0.294443	13434	0.304699
gad	sCCA1	PIxEND	363	243	29403	29352	29196.7	0.802288	29146.3	0.801872
gad	sCCA1	PIxexCA1	403	215	23005	22966	23295.1	0.0885208	23257.1	0.087588
gad	sCCA1	PIxexCA3	405	219	23871	23831	24043.2	0.215023	23991.7	0.230427
gad	sCCA1	PIxexDG	418	225	25200	25151	25618.2	0.0317715	25557.1	0.0356032
gad	sCCA1	PIxexPFC1	359	171	14535	14504	14812.1	0.0527119	14769.7	0.0600182
gad	sCCA1	PIxexPFC2	313	170	14365	14341	14525.1	0.172293	14505.3	0.16591
gad	sCCA1	PIxGABA1	379	176	15400	15372	15395	0.509843	15353.7	0.540065
gad	sCCA1	PIxGABA2	467	223	24753	24701	24913.4	0.234998	24848	0.253707
gad	sCCA1	PIxMG	366	241	28920	28876	28986.7	0.389849	28945.9	0.38468
gad	sCCA1	PIxNSC	269	165	13530	13511	13540	0.47412	13525.8	0.462564
gad	sCCA1	PIxODC1	364	244	29646	29605	29631.2	0.523113	29597.5	0.511239
gad	sCCA1	PIxOPC	349	184	16836	16805	16968.8	0.234063	16943.2	0.225067
gad	sCCA2	ASC1	1646	1047	547581	546590	547972	0.354157	546915	0.377644
gad	sCCA2	ASC2	1668	1038	538203	537187	539575	0.0930625	538403	0.120401
gad	sCCA2	END	1828	1204	724206	722531	725560	0.130274	723864	0.133841
gad	sCCA2	exCA1	1622	884	390286	389384	390655	0.337916	389771	0.330272
gad	sCCA2	exCA3	1620	875	382375	381519	381066	0.932967	380220	0.931698
gad	sCCA2	exDG	1595	855	365085	364382	365546	0.294551	364859	0.287806
gad	sCCA2	exPFC1	1546	781	304590	303999	303760	0.856126	303118	0.870693
gad	sCCA2	exPFC2	1574	867	375411	374701	375135	0.624869	374336	0.663329
gad	sCCA2	GABA1	1627	869	377146	376454	375289	0.983854	374656	0.980988
gad	sCCA2	GABA2	1694	858	367653	366945	368832	0.0847235	368136	0.0824072
gad	sCCA2	MG	1700	1181	696790	695567	695790	0.801522	694550	0.80566
gad	sCCA2	NSC	1703	1101	605550	604409	605459	0.53256	604238	0.561629
gad	sCCA2	ODC1	1637	1096	600060	599089	601870	0.0493313	600850	0.0539282
gad	sCCA2	OPC	1673	966	466095	465395	465209	0.820683	464533	0.814193
gad	sCCA2	PI_genes	3373	1861	1730730	1727707	1.72937e+06	0.768312	1.72636e+06	0.765603
gad	sCCA2	PIxASC1	323	171	14535	14509	14396	0.792124	14371.2	0.790305
gad	sCCA2	PIxASC2	300	156	12090	12076	11849.9	0.939405	11840.3	0.93607
gad	sCCA2	PIxEND	363	228	25878	25833	26117.5	0.146306	26071.6	0.146988
gad	sCCA2	PIxexCA1	403	202	20301	20267	20517.8	0.141128	20487.8	0.136507
gad	sCCA2	PIxexCA3	405	205	20910	20874	20780.9	0.735511	20745.6	0.734428
gad	sCCA2	PIxexDG	418	202	20301	20272	20407.2	0.29827	20378.9	0.296893
gad	sCCA2	PIxexPFC1	359	159	12561	12535	12689.8	0.207844	12659	0.216252
gad	sCCA2	PIxexPFC2	313	158	12403	12384	12229.2	0.865285	12204.1	0.873728
gad	sCCA2	PIxGABA1	379	165	13530	13504	13315	0.904876	13295.7	0.897909
gad	sCCA2	PIxGABA2	467	199	19701	19662	19528.9	0.806768	19488.9	0.808407
gad	sCCA2	PIxMG	366	222	24531	24496	24517.4	0.523261	24482.5	0.523105
gad	sCCA2	PIxNSC	269	152	11476	11462	11531.6	0.355398	11519	0.351978
gad	sCCA2	PIxODC1	364	227	25651	25614	25438.9	0.82543	25403.4	0.823893
gad	sCCA2	PIxOPC	349	169	14196	14171	14286.9	0.293893	14249.9	0.318623
gad	sCCA3	ASC1	1646	1009	508536	507615	507029	0.932599	506114	0.931984
gad	sCCA3	ASC2	1668	992	491536	490628	491112	0.665379	490110	0.699275
gad	sCCA3	END	1828	1150	660675	659145	661933	0.136899	660382	0.140608
gad	sCCA3	exCA1	1622	834	347361	346553	348573	0.0731249	347807	0.0661883
gad	sCCA3	exCA3	1620	843	354903	354075	354452	0.70361	353561	0.729057
gad	sCCA3	exDG	1595	828	342378	341712	343127	0.182711	342468	0.180109
gad	sCCA3	exPFC1	1546	763	290703	290126	290474	0.617661	289903	0.615086
gad	sCCA3	exPFC2	1574	844	355746	355089	354317	0.955022	353632	0.958191
gad	sCCA3	GABA1	1627	840	352380	351734	350805	0.969802	350170	0.969031
gad	sCCA3	GABA2	1694	835	348195	347516	348852	0.215402	348162	0.219113
gad	sCCA3	MG	1700	1133	641278	640115	639630	0.927233	638496	0.923908
gad	sCCA3	NSC	1703	1054	554931	553938	552918	0.972066	551892	0.974164
gad	sCCA3	ODC1	1637	1056	557040	556112	555871	0.865987	555006	0.852893
gad	sCCA3	OPC	1673	940	441330	440652	440027	0.917426	439385	0.911609
gad	sCCA3	PI_genes	3373	1766	1558495	1555797	1.55792e+06	0.627085	1.55522e+06	0.628855
gad	sCCA3	PIxASC1	323	155	11935	11915	11740.7	0.896141	11722.6	0.894182
gad	sCCA3	PIxASC2	300	138	9453	9441	9655.05	0.071598	9638.98	0.0755492
gad	sCCA3	PIxEND	363	218	23653	23613	23717.3	0.382686	23664.5	0.40513
gad	sCCA3	PIxexCA1	403	184	16836	16802	16891.9	0.378969	16860.9	0.372799
gad	sCCA3	PIxexCA3	405	193	18528	18494	18591.2	0.370089	18557.8	0.368817
gad	sCCA3	PIxexDG	418	194	18721	18691	18541.7	0.822865	18516.4	0.816617
gad	sCCA3	PIxexPFC1	359	157	12246	12222	12339.9	0.273392	12322.2	0.25989
gad	sCCA3	PIxexPFC2	313	150	11175	11157	11097.5	0.696709	11078	0.700474
gad	sCCA3	PIxGABA1	379	155	11935	11912	12180.9	0.0565022	12164.4	0.0517333
gad	sCCA3	PIxGABA2	467	187	17391	17354	17346.8	0.592444	17318.1	0.575107
gad	sCCA3	PIxMG	366	213	22578	22538	22637	0.389543	22589	0.403972
gad	sCCA3	PIxNSC	269	141	9870	9858	9725.19	0.848727	9714.72	0.846286
gad	sCCA3	PIxODC1	364	211	22155	22124	22198.7	0.416544	22179.9	0.394048
gad	sCCA3	PIxOPC	349	163	13203	13177	12882.8	0.976272	12859.2	0.975558
height	cortex.PEC	ASC1	1800	1211	732655	731541	736619	0.00053863	735170	0.00136712
height	cortex.PEC	ASC2	1817	1184	700336	699226	702547	0.0309554	701223	0.0457182
height	cortex.PEC	END	1888	1107	612171	611101	614100	0.0407302	612444	0.112274
height	cortex.PEC	exCA1	1812	1170	683865	682767	684340	0.342094	682872	0.464046
height	cortex.PEC	exCA3	1788	1159	671061	669973	672868	0.0595428	671271	0.131016
height	cortex.PEC	exDG	1766	1151	661825	660829	662975	0.158844	661666	0.233329
height	cortex.PEC	exPFC1	1748	1186	702705	701790	702684	0.506922	701378	0.635814
height	cortex.PEC	exPFC2	1754	1208	729028	728078	730869	0.0637976	729407	0.135484
height	cortex.PEC	GABA1	1804	1148	658378	657433	659754	0.115234	658297	0.225495
height	cortex.PEC	GABA2	1817	1120	626640	625787	627220	0.302101	626034	0.412386
height	cortex.PEC	MG	1819	1163	675703	674667	676750	0.183878	675192	0.325487
height	cortex.PEC	NSC	1801	1179	694431	693449	694011	0.638927	692644	0.752769
height	cortex.PEC	ODC1	1757	1201	720600	719572	723018	0.022106	721804	0.0314921
height	cortex.PEC	OPC	1800	1140	649230	648437	650833	0.0798532	649859	0.106018
height	cortex.PEC	PI_genes	3524	1742	1516411	1514376	1.51762e+06	0.243674	1.51428e+06	0.520773
height	cortex.PEC	PIxASC1	344	172	14706	14688	14702.6	0.506464	14681.4	0.513734
height	cortex.PEC	PIxASC2	325	150	11175	11166	11139.5	0.592129	11124.5	0.607907
height	cortex.PEC	PIxEND	390	204	20706	20679	20842.7	0.250247	20808	0.262226
height	cortex.PEC	PIxexCA1	433	230	26335	26302	26398.6	0.389742	26344	0.426178
height	cortex.PEC	PIxexCA3	416	232	26796	26754	27011.9	0.175443	26945.6	0.203502
height	cortex.PEC	PIxexDG	441	239	28441	28401	28648.9	0.191541	28599.3	0.20242
height	cortex.PEC	PIxexPFC1	363	216	23220	23199	23080.7	0.740436	23060.2	0.739769
height	cortex.PEC	PIxexPFC2	315	214	22791	22770	22810.3	0.462713	22784.7	0.471297
height	cortex.PEC	PIxGABA1	401	198	19503	19481	19097.7	0.980443	19055	0.985029
height	cortex.PEC	PIxGABA2	503	247	30381	30345	30378.9	0.502306	30335.5	0.514336
height	cortex.PEC	PIxMG	373	203	20503	20473	20415	0.667125	20372.2	0.690016
height	cortex.PEC	PIxNSC	291	144	10296	10284	10486.4	0.0928987	10465.1	0.103803
height	cortex.PEC	PIxODC1	372	234	27261	27233	27447.1	0.21245	27421.6	0.20919
height	cortex.PEC	PIxOPC	387	181	16290	16271	16443	0.198041	16411.4	0.217751
height	sCCA1	ASC1	1646	1095	598745	597660	597991	0.754453	596258	0.900164
height	sCCA1	ASC2	1668	1087	588581	587482	586727	0.956339	585035	0.988103
height	sCCA1	END	1828	1270	805815	803930	807583	0.0818956	804689	0.274627
height	sCCA1	exCA1	1622	918	420723	419749	421869	0.105847	420299	0.274158
height	sCCA1	exCA3	1620	913	416328	415355	418663	0.00531318	417320	0.0156632
height	sCCA1	exDG	1595	901	405450	404604	404701	0.797165	403337	0.920534
height	sCCA1	exPFC1	1546	816	332520	331863	333122	0.229927	332247	0.318575
height	sCCA1	exPFC2	1574	906	409965	409195	409746	0.595467	408649	0.726938
height	sCCA1	GABA1	1627	911	413595	412833	414700	0.112361	413645	0.185579
height	sCCA1	GABA2	1694	907	410871	410068	414174	0.000139333	412764	0.00148105
height	sCCA1	MG	1700	1249	779376	777995	779967	0.317688	777279	0.716877
height	sCCA1	NSC	1703	1157	668746	667461	669162	0.359494	667322	0.547791
height	sCCA1	ODC1	1637	1164	676466	675349	678406	0.0477894	676573	0.146241
height	sCCA1	OPC	1673	1022	521389	520620	522280	0.191427	521012	0.350316
height	sCCA1	PI_genes	3373	2015	2029105	2025550	2.03082e+06	0.197287	2.02555e+06	0.499952
height	sCCA1	PIxASC1	323	182	16471	16443	16701.2	0.102718	16669.3	0.106376
height	sCCA1	PIxASC2	300	164	13366	13351	13572.8	0.103367	13550.4	0.111598
height	sCCA1	PIxEND	363	243	29403	29352	28997.2	0.953376	28933.9	0.958287
height	sCCA1	PIxexCA1	403	215	23005	22966	23316.6	0.0736106	23252.1	0.0913717
height	sCCA1	PIxexCA3	405	219	23871	23831	24027.6	0.236323	23941.9	0.304936
height	sCCA1	PIxexDG	418	225	25200	25151	24821.5	0.954649	24757.1	0.960994
height	sCCA1	PIxexPFC1	359	171	14535	14504	14478.6	0.628277	14445.3	0.633478
height	sCCA1	PIxexPFC2	313	170	14365	14341	14105.4	0.937851	14071.6	0.944838
height	sCCA1	PIxGABA1	379	176	15400	15372	15219.7	0.847922	15169.5	0.87624
height	sCCA1	PIxGABA2	467	223	24753	24701	24971.1	0.163494	24888.8	0.198825
height	sCCA1	PIxMG	366	241	28920	28876	29030.6	0.321986	28780.2	0.654015
height	sCCA1	PIxNSC	269	165	13530	13511	13596.1	0.342748	13569.6	0.35948
height	sCCA1	PIxODC1	364	244	29646	29605	29444.2	0.796175	29404.1	0.795296
height	sCCA1	PIxOPC	349	184	16836	16805	17147	0.0456965	17115.6	0.0457528
height	sCCA2	ASC1	1646	1047	547581	546590	548049	0.327311	546568	0.507992
height	sCCA2	ASC2	1668	1038	538203	537187	536451	0.95443	534930	0.98535
height	sCCA2	END	1828	1204	724206	722531	727363	0.0043962	724896	0.0246417
height	sCCA2	exCA1	1622	884	390286	389384	389324	0.861839	387917	0.951888
height	sCCA2	exCA3	1620	875	382375	381519	383096	0.204637	381904	0.329672
height	sCCA2	exDG	1595	855	365085	364382	365314	0.394005	364150	0.606865
height	sCCA2	exPFC1	1546	781	304590	303999	305234	0.204689	304340	0.330656
height	sCCA2	exPFC2	1574	867	375411	374701	377237	0.0176678	376275	0.0346328
height	sCCA2	GABA1	1627	869	377146	376454	378218	0.108605	377112	0.224162
height	sCCA2	GABA2	1694	858	367653	366945	368523	0.155043	367555	0.237924
height	sCCA2	MG	1700	1181	696790	695567	699079	0.0263399	697012	0.110352
height	sCCA2	NSC	1703	1101	605550	604409	606221	0.270805	604595	0.432644
height	sCCA2	ODC1	1637	1096	600060	599089	604124	0.000106895	602384	0.00132806
height	sCCA2	OPC	1673	966	466095	465395	467551	0.0658418	466466	0.13341
height	sCCA2	PI_genes	3373	1861	1728870	1725851	1.72721e+06	0.813856	1.72266e+06	0.957174
height	sCCA2	PIxASC1	323	171	14535	14509	14583.2	0.387219	14535.6	0.436437
height	sCCA2	PIxASC2	300	156	12090	12076	11973.9	0.771737	11951.8	0.787388
height	sCCA2	PIxEND	363	228	25878	25833	26265.1	0.0449559	26196	0.0556567
height	sCCA2	PIxexCA1	403	202	20301	20267	20371.5	0.362143	20322.2	0.390748
height	sCCA2	PIxexCA3	405	205	20910	20874	20970.2	0.383128	20930.7	0.389574
height	sCCA2	PIxexDG	418	202	20301	20272	20202.9	0.685888	20165.5	0.700698
height	sCCA2	PIxexPFC1	359	159	12561	12535	12437	0.782578	12404.4	0.794837
height	sCCA2	PIxexPFC2	313	158	12403	12384	12119.6	0.964778	12088.1	0.970709
height	sCCA2	PIxGABA1	379	165	13530	13504	13566	0.41178	13510.5	0.482504
height	sCCA2	PIxGABA2	467	199	19701	19662	19846.3	0.231543	19797.9	0.245992
height	sCCA2	PIxMG	366	222	24531	24496	24351.3	0.791053	24290.6	0.823175
height	sCCA2	PIxNSC	269	152	11476	11462	11441.9	0.587319	11415.7	0.618475
height	sCCA2	PIxODC1	364	227	25651	25614	25467.1	0.791317	25386.4	0.842711
height	sCCA2	PIxOPC	349	169	14196	14171	14072.2	0.768171	13993.6	0.854052
height	sCCA3	ASC1	1646	1009	508536	507615	509223	0.247673	507769	0.439198
height	sCCA3	ASC2	1668	992	491536	490628	492807	0.0999781	491435	0.207451
height	sCCA3	END	1828	1150	660675	659145	662085	0.110001	659730	0.30514
height	sCCA3	exCA1	1622	834	347361	346553	348518	0.0826286	347239	0.204988
height	sCCA3	exCA3	1620	843	354903	354075	356336	0.0446568	355072	0.118062
height	sCCA3	exDG	1595	828	342378	341712	340904	0.962734	340059	0.97737
height	sCCA3	exPFC1	1546	763	290703	290126	290097	0.786597	289320	0.854895
height	sCCA3	exPFC2	1574	844	355746	355089	356132	0.323311	355155	0.468709
height	sCCA3	GABA1	1627	840	351541	350896	352963	0.0451108	352024	0.0892529
height	sCCA3	GABA2	1694	835	348195	347516	349655	0.0402805	348617	0.0934294
height	sCCA3	MG	1700	1133	641278	640115	641870	0.300509	640067	0.516623
height	sCCA3	NSC	1703	1054	554931	553938	556202	0.113924	554442	0.315913
height	sCCA3	ODC1	1637	1056	557040	556112	559305	0.0160429	557703	0.0658315
height	sCCA3	OPC	1673	940	441330	440652	442048	0.222347	440937	0.380433
height	sCCA3	PI_genes	3373	1766	1558495	1555797	1.56112e+06	0.0686351	1.55696e+06	0.254316
height	sCCA3	PIxASC1	323	155	11935	11915	12005.6	0.322735	11990.3	0.311639
height	sCCA3	PIxASC2	300	138	9453	9441	9321.87	0.829764	9313.54	0.823017
height	sCCA3	PIxEND	363	218	23653	23613	23617.9	0.562967	23563.5	0.588881
height	sCCA3	PIxexCA1	403	184	16836	16802	16987.3	0.204537	16945.9	0.215812
height	sCCA3	PIxexCA3	405	193	18528	18494	18393.8	0.756669	18314.1	0.825113
height	sCCA3	PIxexDG	418	194	18721	18691	18518.8	0.852063	18498.7	0.840091
height	sCCA3	PIxexPFC1	359	157	12246	12222	12352	0.248421	12317	0.270799
height	sCCA3	PIxexPFC2	313	150	11175	11157	10973.8	0.911373	10952.2	0.915395
height	sCCA3	PIxGABA1	379	155	11935	11912	12272.2	0.0151389	12219	0.0240576
height	sCCA3	PIxGABA2	467	187	17391	17354	17277.3	0.728139	17224.1	0.756549
height	sCCA3	PIxMG	366	213	22578	22538	22494.7	0.651515	22444.5	0.669173
height	sCCA3	PIxNSC	269	141	9870	9858	9932.52	0.326782	9917.94	0.333326
height	sCCA3	PIxODC1	364	211	22155	22124	22566.3	0.0258841	22509.4	0.034016
height	sCCA3	PIxOPC	349	163	13203	13177	13261.4	0.35842	13173.4	0.507108
mdd	cortex.PEC	ASC1	1800	1211	732323	731209	733262	0.218821	732152	0.217776
mdd	cortex.PEC	ASC2	1817	1184	699576	698468	701121	0.0958461	700031	0.093041
mdd	cortex.PEC	END	1888	1107	611574	610504	613470	0.0433357	612398	0.0433318
mdd	cortex.PEC	exCA1	1812	1170	683811	682714	686305	0.016562	685138	0.0190927
mdd	cortex.PEC	exCA3	1788	1159	671061	669973	673551	0.0158772	672392	0.0184269
mdd	cortex.PEC	exDG	1766	1151	661825	660829	663526	0.0697382	662476	0.0760623
mdd	cortex.PEC	exPFC1	1748	1186	701966	701053	705603	0.00108874	704641	0.00124166
mdd	cortex.PEC	exPFC2	1754	1208	728370	727422	729076	0.279062	728154	0.271827
mdd	cortex.PEC	GABA1	1804	1148	658378	657433	661645	0.00223419	660728	0.00205469
mdd	cortex.PEC	GABA2	1817	1120	625533	624684	627571	0.0343058	626729	0.0337655
mdd	cortex.PEC	MG	1819	1163	675155	674119	676506	0.122495	675449	0.126024
mdd	cortex.PEC	NSC	1801	1179	692846	691865	694298	0.10882	693301	0.111184
mdd	cortex.PEC	ODC1	1757	1201	720299	719271	719708	0.68855	718691	0.685513
mdd	cortex.PEC	OPC	1800	1140	648944	648152	652273	0.00176443	651429	0.00202749
mdd	cortex.PEC	PI_genes	3524	1742	1515614	1513581	1.51972e+06	0.00916716	1.51768e+06	0.00932259
mdd	cortex.PEC	PIxASC1	344	172	14678	14660	14458.5	0.900344	14441	0.899984
mdd	cortex.PEC	PIxASC2	325	150	11153	11144	10998.6	0.84944	10984.6	0.857295
mdd	cortex.PEC	PIxEND	390	204	20706	20679	20503.6	0.840013	20464.2	0.854625
mdd	cortex.PEC	PIxexCA1	433	230	26335	26302	26400.5	0.386692	26362.5	0.394968
mdd	cortex.PEC	PIxexCA3	416	232	26796	26754	27101	0.094169	27049.3	0.101206
mdd	cortex.PEC	PIxexDG	441	239	28441	28401	28051.9	0.949106	28002.3	0.95332
mdd	cortex.PEC	PIxexPFC1	363	216	23220	23199	23473.4	0.120079	23446.8	0.125174
mdd	cortex.PEC	PIxexPFC2	315	214	22791	22770	22867.6	0.358838	22855	0.344207
mdd	cortex.PEC	PIxGABA1	401	198	19503	19481	19352.8	0.776167	19343.6	0.75625
mdd	cortex.PEC	PIxGABA2	503	247	30381	30345	30277.1	0.662466	30233.2	0.674232
mdd	cortex.PEC	PIxMG	373	203	20503	20473	20147.8	0.960884	20111.8	0.96347
mdd	cortex.PEC	PIxNSC	291	144	10296	10284	10163.7	0.821591	10153.5	0.818458
mdd	cortex.PEC	PIxODC1	372	234	27261	27233	27443	0.217572	27431.3	0.197583
mdd	cortex.PEC	PIxOPC	387	181	16263	16244	16387.6	0.244183	16367.6	0.245819
mdd	sCCA1	ASC1	1646	1095	598965	597880	598569	0.641224	597524	0.627469
mdd	sCCA1	ASC2	1668	1087	589155	588056	590257	0.15497	589163	0.15363
mdd	sCCA1	END	1828	1270	805815	803930	805492	0.600145	803759	0.553405
mdd	sCCA1	exCA1	1622	918	420903	419929	420014	0.833752	419054	0.830126
mdd	sCCA1	exCA3	1620	913	416328	415355	414373	0.984007	413400	0.984112
mdd	sCCA1	exDG	1595	901	405450	404604	403610	0.979585	402715	0.982236
mdd	sCCA1	exPFC1	1546	816	332520	331863	332799	0.365954	332130	0.371315
mdd	sCCA1	exPFC2	1574	906	409965	409195	408746	0.911061	407906	0.923012
mdd	sCCA1	GABA1	1627	911	413595	412833	415091	0.0501576	414361	0.0464689
mdd	sCCA1	GABA2	1694	907	410871	410068	411700	0.18006	410921	0.173156
mdd	sCCA1	MG	1700	1249	779376	777995	779424	0.484524	778074	0.474434
mdd	sCCA1	NSC	1703	1157	668746	667461	667585	0.842353	666260	0.85063
mdd	sCCA1	ODC1	1637	1164	676866	675748	676199	0.71675	675155	0.694907
mdd	sCCA1	OPC	1673	1022	521731	520962	521309	0.660061	520428	0.699362
mdd	sCCA1	PI_genes	3373	2015	2029105	2025550	2.02894e+06	0.531672	2.02535e+06	0.540153
mdd	sCCA1	PIxASC1	323	182	16471	16443	16329.3	0.782156	16302.3	0.780576
mdd	sCCA1	PIxASC2	300	164	13366	13351	13212.8	0.825527	13195.4	0.829344
mdd	sCCA1	PIxEND	363	243	29403	29352	29428.7	0.4568	29390.6	0.435635
mdd	sCCA1	PIxexCA1	403	215	23005	22966	22592.3	0.973342	22557.4	0.972235
mdd	sCCA1	PIxexCA3	405	219	23871	23831	23418.6	0.981265	23391.5	0.978454
mdd	sCCA1	PIxexDG	418	225	25200	25151	24776.7	0.970837	24741.8	0.966471
mdd	sCCA1	PIxexPFC1	359	171	14535	14504	14509.5	0.558023	14467.3	0.583911
mdd	sCCA1	PIxexPFC2	313	170	14365	14341	14233.9	0.779861	14204	0.790363
mdd	sCCA1	PIxGABA1	379	176	15400	15372	15540.9	0.210693	15500.5	0.231313
mdd	sCCA1	PIxGABA2	467	223	24753	24701	24557.1	0.810553	24505	0.810917
mdd	sCCA1	PIxMG	366	241	28920	28876	28824.6	0.653303	28788.1	0.641875
mdd	sCCA1	PIxNSC	269	165	13530	13511	13352.2	0.860246	13330.1	0.864575
mdd	sCCA1	PIxODC1	364	244	29646	29605	29305.8	0.919228	29269.8	0.916212
mdd	sCCA1	PIxOPC	349	184	16836	16805	16887.8	0.387623	16859.1	0.382631
mdd	sCCA2	ASC1	1646	1047	547581	546590	546856	0.755589	545895	0.746808
mdd	sCCA2	ASC2	1668	1038	538203	537187	538065	0.552636	536923	0.6002
mdd	sCCA2	END	1828	1204	724206	722531	723341	0.763742	721682	0.759948
mdd	sCCA2	exCA1	1622	884	390286	389384	391379	0.108124	390471	0.109087
mdd	sCCA2	exCA3	1620	875	382375	381519	382671	0.367068	381659	0.436097
mdd	sCCA2	exDG	1595	855	365085	364382	365377	0.366152	364616	0.391675
mdd	sCCA2	exPFC1	1546	781	304590	303999	305307	0.179066	304704	0.182889
mdd	sCCA2	exPFC2	1574	867	375411	374701	375497	0.460364	374709	0.496061
mdd	sCCA2	GABA1	1627	869	377146	376454	378100	0.136	377431	0.130128
mdd	sCCA2	GABA2	1694	858	367653	366945	368017	0.335227	367379	0.305934
mdd	sCCA2	MG	1700	1181	696790	695567	696489	0.600539	695224	0.61414
mdd	sCCA2	NSC	1703	1101	605550	604409	604407	0.850588	603235	0.857223
mdd	sCCA2	ODC1	1637	1096	600060	599089	600609	0.307827	599641	0.30696
mdd	sCCA2	OPC	1673	966	466095	465395	466944	0.189517	466188	0.205611
mdd	sCCA2	PI_genes	3373	1861	1728870	1725851	1.72534e+06	0.971093	1.72223e+06	0.974394
mdd	sCCA2	PIxASC1	323	171	14535	14509	14634.2	0.279558	14611.3	0.273225
mdd	sCCA2	PIxASC2	300	156	12090	12076	12106.9	0.454994	12086	0.472666
mdd	sCCA2	PIxEND	363	228	25878	25833	25615.4	0.875978	25577.2	0.869957
mdd	sCCA2	PIxexCA1	403	202	20301	20267	20095.9	0.845649	20068.2	0.83826
mdd	sCCA2	PIxexCA3	405	205	20910	20874	20473.7	0.984027	20433.4	0.984941
mdd	sCCA2	PIxexDG	418	202	20301	20272	20277.6	0.5449	20256.9	0.528483
mdd	sCCA2	PIxexPFC1	359	159	12561	12535	12468.7	0.718907	12444.9	0.714443
mdd	sCCA2	PIxexPFC2	313	158	12403	12384	12404.5	0.494404	12377.5	0.514692
mdd	sCCA2	PIxGABA1	379	165	13530	13504	13520.1	0.52228	13480.7	0.554884
mdd	sCCA2	PIxGABA2	467	199	19701	19662	19526.5	0.810065	19497.4	0.796392
mdd	sCCA2	PIxMG	366	222	24531	24496	24524.6	0.510377	24488.5	0.512314
mdd	sCCA2	PIxNSC	269	152	11476	11462	11367.2	0.76307	11356.3	0.756802
mdd	sCCA2	PIxODC1	364	227	25651	25614	25734.6	0.355126	25710.6	0.333855
mdd	sCCA2	PIxOPC	349	169	14196	14171	14171.3	0.556745	14147.5	0.553924
mdd	sCCA3	ASC1	1646	1009	508536	507615	506989	0.937565	506163	0.925254
mdd	sCCA3	ASC2	1668	992	491536	490628	490754	0.784768	489865	0.779283
mdd	sCCA3	END	1828	1150	660675	659145	661457	0.247974	659884	0.259783
mdd	sCCA3	exCA1	1622	834	347361	346553	346080	0.93797	345291	0.935391
mdd	sCCA3	exCA3	1620	843	354903	354075	354434	0.71087	353591	0.717042
mdd	sCCA3	exDG	1595	828	342378	341712	343010	0.222348	342396	0.203842
mdd	sCCA3	exPFC1	1546	763	290703	290126	291957	0.0501363	291403	0.0470376
mdd	sCCA3	exPFC2	1574	844	355746	355089	355763	0.491827	355149	0.471346
mdd	sCCA3	GABA1	1627	840	351541	350896	353848	0.00301244	353199	0.00303062
mdd	sCCA3	GABA2	1694	835	348195	347516	350812	0.000875729	350112	0.000945693
mdd	sCCA3	MG	1700	1133	641278	640115	642428	0.154989	641308	0.145844
mdd	sCCA3	NSC	1703	1054	554931	553938	555033	0.461021	554017	0.469798
mdd	sCCA3	ODC1	1637	1056	557040	556112	555900	0.859989	555000	0.85427
mdd	sCCA3	OPC	1673	940	441330	440652	441735	0.332948	441052	0.334692
mdd	sCCA3	PI_genes	3373	1766	1558495	1555797	1.55603e+06	0.918873	1.55332e+06	0.919654
mdd	sCCA3	PIxASC1	323	155	11935	11915	11769.8	0.857627	11759.5	0.843078
mdd	sCCA3	PIxASC2	300	138	9453	9441	9500.48	0.363336	9481.32	0.382912
mdd	sCCA3	PIxEND	363	218	23653	23613	23731.7	0.357746	23683	0.372721
mdd	sCCA3	PIxexCA1	403	184	16836	16802	16686.7	0.791658	16659.9	0.780514
mdd	sCCA3	PIxexCA3	405	193	18528	18494	18423.5	0.705563	18396.8	0.692397
mdd	sCCA3	PIxexDG	418	194	18721	18691	18611.4	0.713699	18594.9	0.689489
mdd	sCCA3	PIxexPFC1	359	157	12246	12222	12289.8	0.388167	12261.6	0.398433
mdd	sCCA3	PIxexPFC2	313	150	11175	11157	11307.6	0.187305	11289.8	0.186707
mdd	sCCA3	PIxGABA1	379	155	11935	11912	11994.7	0.348338	11974.8	0.34077
mdd	sCCA3	PIxGABA2	467	187	17391	17354	17635.3	0.095569	17589.9	0.103111
mdd	sCCA3	PIxMG	366	213	22578	22538	22521.7	0.603365	22480	0.606534
mdd	sCCA3	PIxNSC	269	141	9870	9858	9713.52	0.867567	9689.52	0.885321
mdd	sCCA3	PIxODC1	364	211	22155	22124	22146	0.515872	22125.5	0.495891
mdd	sCCA3	PIxOPC	349	163	13203	13177	13099.3	0.737464	13080.6	0.722728
neuroticism	cortex.PEC	ASC1	1800	1211	732655	731541	734471	0.0668948	733352	0.0672284
neuroticism	cortex.PEC	ASC2	1817	1184	700336	699226	702009	0.07883	700901	0.0784488
neuroticism	cortex.PEC	END	1888	1107	612171	611101	612606	0.347089	611496	0.360157
neuroticism	cortex.PEC	exCA1	1812	1170	683865	682767	684176	0.394812	683066	0.39866
neuroticism	cortex.PEC	exCA3	1788	1159	671061	669973	670277	0.750575	669095	0.775731
neuroticism	cortex.PEC	exDG	1766	1151	661825	660829	660912	0.786093	659935	0.781631
neuroticism	cortex.PEC	exPFC1	1748	1186	702705	701790	703816	0.174332	702819	0.192468
neuroticism	cortex.PEC	exPFC2	1754	1208	729028	728078	728094	0.780276	727029	0.807633
neuroticism	cortex.PEC	GABA1	1804	1148	658378	657433	659291	0.212987	658330	0.216966
neuroticism	cortex.PEC	GABA2	1817	1120	626640	625787	626632	0.502737	625747	0.513951
neuroticism	cortex.PEC	MG	1819	1163	675703	674667	674896	0.756055	673826	0.765361
neuroticism	cortex.PEC	NSC	1801	1179	694431	693449	695887	0.108431	694771	0.130792
neuroticism	cortex.PEC	ODC1	1757	1201	720600	719572	719068	0.89915	718014	0.903102
neuroticism	cortex.PEC	OPC	1800	1140	649230	648437	648585	0.714145	647810	0.70889
neuroticism	cortex.PEC	PI_genes	3524	1742	1516411	1514376	1.5188e+06	0.0847821	1.51655e+06	0.105992
neuroticism	cortex.PEC	PIxASC1	344	172	14706	14688	14762.5	0.3697	14751.8	0.353527
neuroticism	cortex.PEC	PIxASC2	325	150	11175	11166	11289.1	0.222119	11276.2	0.229827
neuroticism	cortex.PEC	PIxEND	390	204	20706	20679	20388.4	0.941277	20362.6	0.940692
neuroticism	cortex.PEC	PIxexCA1	433	230	26335	26302	26488	0.251928	26452	0.256081
neuroticism	cortex.PEC	PIxexCA3	416	232	26796	26754	26775.8	0.533549	26716.8	0.562773
neuroticism	cortex.PEC	PIxexDG	441	239	28441	28401	28386.1	0.589933	28339.3	0.601092
neuroticism	cortex.PEC	PIxexPFC1	363	216	23220	23199	23202.1	0.531911	23173.3	0.546218
neuroticism	cortex.PEC	PIxexPFC2	315	214	22791	22770	22657.2	0.733913	22624.7	0.751561
neuroticism	cortex.PEC	PIxGABA1	401	198	19503	19481	19721.9	0.134037	19687.9	0.147395
neuroticism	cortex.PEC	PIxGABA2	503	247	30381	30345	30677.6	0.114702	30627.8	0.125634
neuroticism	cortex.PEC	PIxMG	373	203	20503	20473	20338.2	0.791772	20300.5	0.802715
neuroticism	cortex.PEC	PIxNSC	291	144	10296	10284	10286.3	0.525242	10279.4	0.510845
neuroticism	cortex.PEC	PIxODC1	372	234	27261	27233	27216.3	0.574891	27188.7	0.574146
neuroticism	cortex.PEC	PIxOPC	387	181	16290	16271	16502.3	0.120077	16478	0.12586
neuroticism	sCCA1	ASC1	1646	1095	598965	597880	599987	0.175285	598927	0.169133
neuroticism	sCCA1	ASC2	1668	1087	589155	588056	589805	0.27463	588698	0.276688
neuroticism	sCCA1	END	1828	1270	805815	803930	806076	0.418474	804115	0.441708
neuroticism	sCCA1	exCA1	1622	918	420903	419929	420538	0.654211	419504	0.678316
neuroticism	sCCA1	exCA3	1620	913	416328	415355	417785	0.0552988	416817	0.0545118
neuroticism	sCCA1	exDG	1595	901	405450	404604	407464	0.0127693	406614	0.0128131
neuroticism	sCCA1	exPFC1	1546	816	332520	331863	331004	0.968602	330401	0.963805
neuroticism	sCCA1	exPFC2	1574	906	409965	409195	408324	0.965143	407556	0.965151
neuroticism	sCCA1	GABA1	1627	911	413595	412833	411878	0.970568	411133	0.96944
neuroticism	sCCA1	GABA2	1694	907	410871	410068	411873	0.134476	411086	0.130498
neuroticism	sCCA1	MG	1700	1249	779376	777995	778261	0.814151	776844	0.82186
neuroticism	sCCA1	NSC	1703	1157	668746	667461	669751	0.192402	668436	0.199335
neuroticism	sCCA1	ODC1	1637	1164	676866	675748	673957	0.993844	672815	0.994235
neuroticism	sCCA1	OPC	1673	1022	521731	520962	521198	0.699052	520328	0.732609
neuroticism	sCCA1	PI_genes	3373	2015	2029105	2025550	2.0314e+06	0.127582	2.02786e+06	0.125328
neuroticism	sCCA1	PIxASC1	323	182	16471	16443	16393.3	0.664578	16372.3	0.650465
neuroticism	sCCA1	PIxASC2	300	164	13366	13351	13436.3	0.332483	13418.3	0.33892
neuroticism	sCCA1	PIxEND	363	243	29403	29352	29290.5	0.677895	29218.5	0.708456
neuroticism	sCCA1	PIxexCA1	403	215	23005	22966	23269.3	0.109237	23222.6	0.11584
neuroticism	sCCA1	PIxexCA3	405	219	23871	23831	23845.3	0.5457	23802	0.551587
neuroticism	sCCA1	PIxexDG	418	225	25200	25151	25260.6	0.392603	25199	0.414232
neuroticism	sCCA1	PIxexPFC1	359	171	14535	14504	14504.5	0.56947	14478.7	0.557479
neuroticism	sCCA1	PIxexPFC2	313	170	14365	14341	14231.2	0.784696	14198.1	0.80037
neuroticism	sCCA1	PIxGABA1	379	176	15400	15372	15443.2	0.401503	15420.6	0.389559
neuroticism	sCCA1	PIxGABA2	467	223	24753	24701	25077.7	0.0727096	25003	0.0874972
neuroticism	sCCA1	PIxMG	366	241	28920	28876	29282.2	0.0664773	29225.7	0.0732592
neuroticism	sCCA1	PIxNSC	269	165	13530	13511	13690	0.165338	13678.3	0.154442
neuroticism	sCCA1	PIxODC1	364	244	29646	29605	29958.9	0.0996668	29909.2	0.105901
neuroticism	sCCA1	PIxOPC	349	184	16836	16805	16856.1	0.455038	16828.3	0.448071
neuroticism	sCCA2	ASC1	1646	1047	547581	546590	546435	0.863244	545395	0.873607
neuroticism	sCCA2	ASC2	1668	1038	538203	537187	538861	0.262943	537825	0.269023
neuroticism	sCCA2	END	1828	1204	724206	722531	727644	0.00216556	725922	0.00242418
neuroticism	sCCA2	exCA1	1622	884	390286	389384	390370	0.461683	389333	0.522547
neuroticism	sCCA2	exCA3	1620	875	382375	381519	381745	0.764166	380750	0.810715
neuroticism	sCCA2	exDG	1595	855	365085	364382	366253	0.0859721	365481	0.0989749
neuroticism	sCCA2	exPFC1	1546	781	304590	303999	303097	0.972283	302421	0.978611
neuroticism	sCCA2	exPFC2	1574	867	375411	374701	374099	0.93514	373293	0.948266
neuroticism	sCCA2	GABA1	1627	869	377146	376454	376528	0.761625	375768	0.7852
neuroticism	sCCA2	GABA2	1694	858	367653	366945	370057	0.00256604	369323	0.0028
neuroticism	sCCA2	MG	1700	1181	696790	695567	697190	0.367069	695857	0.402575
neuroticism	sCCA2	NSC	1703	1101	605550	604409	606732	0.141439	605590	0.141328
neuroticism	sCCA2	ODC1	1637	1096	600060	599089	599084	0.813507	598078	0.82224
neuroticism	sCCA2	OPC	1673	966	466095	465395	466131	0.484899	465356	0.515803
neuroticism	sCCA2	PI_genes	3373	1861	1728870	1725851	1.72945e+06	0.377476	1.72632e+06	0.399455
neuroticism	sCCA2	PIxASC1	323	171	14535	14509	14505.2	0.567916	14479.4	0.567576
neuroticism	sCCA2	PIxASC2	300	156	12090	12076	11953.8	0.80913	11931.9	0.823023
neuroticism	sCCA2	PIxEND	363	228	25878	25833	26080.2	0.186925	26042.4	0.178398
neuroticism	sCCA2	PIxexCA1	403	202	20301	20267	20217.5	0.659765	20180.9	0.664618
neuroticism	sCCA2	PIxexCA3	405	205	20910	20874	20931.1	0.457638	20887.4	0.472606
neuroticism	sCCA2	PIxexDG	418	202	20301	20272	20303.4	0.493968	20277.8	0.487134
neuroticism	sCCA2	PIxexPFC1	359	159	12561	12535	12447.5	0.762478	12405	0.793759
neuroticism	sCCA2	PIxexPFC2	313	158	12403	12384	12516.7	0.234556	12482.2	0.265414
neuroticism	sCCA2	PIxGABA1	379	165	13530	13504	13571	0.400013	13549.2	0.390239
neuroticism	sCCA2	PIxGABA2	467	199	19701	19662	19533.8	0.799995	19490.1	0.806718
neuroticism	sCCA2	PIxMG	366	222	24531	24496	24319.7	0.829877	24285.7	0.828928
neuroticism	sCCA2	PIxNSC	269	152	11476	11462	11480	0.487798	11471.9	0.472285
neuroticism	sCCA2	PIxODC1	364	227	25651	25614	25209.7	0.974817	25175.6	0.974109
neuroticism	sCCA2	PIxOPC	349	169	14196	14171	13629.2	0.99967	13597.5	0.999719
neuroticism	sCCA3	ASC1	1646	1009	508536	507615	510557	0.0226604	509704	0.0191578
neuroticism	sCCA3	ASC2	1668	992	491536	490628	492580	0.146304	491725	0.134178
neuroticism	sCCA3	END	1828	1150	660675	659145	662287	0.0805123	660749	0.0812706
neuroticism	sCCA3	exCA1	1622	834	347361	346553	347522	0.423026	346678	0.440223
neuroticism	sCCA3	exCA3	1620	843	354903	354075	355638	0.191428	354791	0.19745
neuroticism	sCCA3	exDG	1595	828	342378	341712	341348	0.893522	340685	0.892973
neuroticism	sCCA3	exPFC1	1546	763	290703	290126	290292	0.704856	289683	0.719456
neuroticism	sCCA3	exPFC2	1574	844	355746	355089	354391	0.946041	353743	0.944969
neuroticism	sCCA3	GABA1	1627	840	351541	350896	351286	0.619221	350579	0.647246
neuroticism	sCCA3	GABA2	1694	835	348195	347516	350664	0.00157386	349924	0.00197365
neuroticism	sCCA3	MG	1700	1133	641278	640115	642095	0.235251	640880	0.249354
neuroticism	sCCA3	NSC	1703	1054	554931	553938	554564	0.636077	553571	0.636206
neuroticism	sCCA3	ODC1	1637	1056	557040	556112	555251	0.955063	554270	0.95975
neuroticism	sCCA3	OPC	1673	940	441330	440652	442268	0.158964	441609	0.154135
neuroticism	sCCA3	PI_genes	3373	1766	1558495	1555797	1.55777e+06	0.658739	1.55506e+06	0.661459
neuroticism	sCCA3	PIxASC1	323	155	11935	11915	12239.8	0.0249597	12220.3	0.0246802
neuroticism	sCCA3	PIxASC2	300	138	9453	9441	9538.4	0.266286	9528.33	0.261606
neuroticism	sCCA3	PIxEND	363	218	23653	23613	23525.3	0.720836	23485.8	0.720168
neuroticism	sCCA3	PIxexCA1	403	184	16836	16802	17054.4	0.117289	17019.2	0.118334
neuroticism	sCCA3	PIxexCA3	405	193	18528	18494	18825	0.0619945	18792.3	0.061
neuroticism	sCCA3	PIxexDG	418	194	18721	18691	18766.6	0.405646	18746.5	0.385868
neuroticism	sCCA3	PIxexPFC1	359	157	12246	12222	12179.8	0.662471	12142.9	0.69243
neuroticism	sCCA3	PIxexPFC2	313	150	11175	11157	11094.9	0.702753	11076.3	0.704451
neuroticism	sCCA3	PIxGABA1	379	155	11935	11912	12137.4	0.0955845	12116.7	0.0929705
neuroticism	sCCA3	PIxGABA2	467	187	17391	17354	17453.5	0.367532	17413.7	0.373098
neuroticism	sCCA3	PIxMG	366	213	22578	22538	22687.4	0.302482	22658.4	0.284559
neuroticism	sCCA3	PIxNSC	269	141	9870	9858	9818.94	0.640313	9798.55	0.662573
neuroticism	sCCA3	PIxODC1	364	211	22155	22124	21999.1	0.770111	21964.9	0.774844
neuroticism	sCCA3	PIxOPC	349	163	13203	13177	12922.5	0.958592	12903.9	0.954498
pAUDIT	cortex.PEC	ASC1	1800	1211	732655	731541	733137	0.345002	731993	0.354157
pAUDIT	cortex.PEC	ASC2	1817	1184	700336	699226	699597	0.733737	698460	0.741354
pAUDIT	cortex.PEC	END	1888	1107	612171	611101	608950	0.998226	607827	0.998492
pAUDIT	cortex.PEC	exCA1	1812	1170	683865	682767	683854	0.50348	682803	0.487415
pAUDIT	cortex.PEC	exCA3	1788	1159	671061	669973	670619	0.648337	669623	0.618758
pAUDIT	cortex.PEC	exDG	1766	1151	661825	660829	661852	0.490345	660892	0.477845
pAUDIT	cortex.PEC	exPFC1	1748	1186	702705	701790	699159	0.998631	698311	0.998365
pAUDIT	cortex.PEC	exPFC2	1754	1208	729028	728078	725836	0.995937	724873	0.996083
pAUDIT	cortex.PEC	GABA1	1804	1148	658378	657433	659109	0.261915	658187	0.255306
pAUDIT	cortex.PEC	GABA2	1817	1120	626640	625787	626386	0.589626	625572	0.575959
pAUDIT	cortex.PEC	MG	1819	1163	675703	674667	674302	0.885994	673303	0.879861
pAUDIT	cortex.PEC	NSC	1801	1179	694431	693449	693773	0.711639	692810	0.706289
pAUDIT	cortex.PEC	ODC1	1757	1201	720600	719572	718785	0.934792	717765	0.93407
pAUDIT	cortex.PEC	OPC	1800	1140	649230	648437	648352	0.779496	647583	0.773193
pAUDIT	cortex.PEC	PI_genes	3524	1742	1516411	1514376	1.51869e+06	0.0950659	1.51669e+06	0.0919749
pAUDIT	cortex.PEC	PIxASC1	344	172	14706	14688	14888.2	0.144117	14870.8	0.143209
pAUDIT	cortex.PEC	PIxASC2	325	150	11175	11166	11090.4	0.713228	11087.5	0.699088
pAUDIT	cortex.PEC	PIxEND	390	204	20706	20679	21115.6	0.0225799	21083.8	0.0237941
pAUDIT	cortex.PEC	PIxexCA1	433	230	26335	26302	26831.1	0.0157315	26790.6	0.0169995
pAUDIT	cortex.PEC	PIxexCA3	416	232	26796	26754	27142.1	0.067909	27086.9	0.0754756
pAUDIT	cortex.PEC	PIxexDG	441	239	28441	28401	28850.6	0.0434612	28794.8	0.0497268
pAUDIT	cortex.PEC	PIxexPFC1	363	216	23220	23199	23635.8	0.0273577	23625	0.0244899
pAUDIT	cortex.PEC	PIxexPFC2	315	214	22791	22770	22576.8	0.842176	22564.9	0.831699
pAUDIT	cortex.PEC	PIxGABA1	401	198	19503	19481	19971.5	0.00921841	19956.1	0.0084021
pAUDIT	cortex.PEC	PIxGABA2	503	247	30381	30345	30343.4	0.55961	30301.1	0.569665
pAUDIT	cortex.PEC	PIxMG	373	203	20503	20473	20804.6	0.0687102	20770.4	0.0713405
pAUDIT	cortex.PEC	PIxNSC	291	144	10296	10284	10438.2	0.160831	10432.3	0.150614
pAUDIT	cortex.PEC	PIxODC1	372	234	27261	27233	27074.9	0.787022	27048.2	0.785483
pAUDIT	cortex.PEC	PIxOPC	387	181	16290	16271	15880.8	0.988765	15866	0.988102
pAUDIT	sCCA1	ASC1	1646	1095	598965	597880	598562	0.643428	597423	0.661647
pAUDIT	sCCA1	ASC2	1668	1087	589155	588056	589644	0.325971	588533	0.329682
pAUDIT	sCCA1	END	1828	1270	805815	803930	803872	0.937118	801918	0.943841
pAUDIT	sCCA1	exCA1	1622	918	420903	419929	420902	0.500231	419936	0.496666
pAUDIT	sCCA1	exCA3	1620	913	416328	415355	413960	0.995333	412970	0.995615
pAUDIT	sCCA1	exDG	1595	901	405450	404604	404290	0.901223	403461	0.898202
pAUDIT	sCCA1	exPFC1	1546	816	332520	331863	331940	0.761451	331279	0.763313
pAUDIT	sCCA1	exPFC2	1574	906	409965	409195	410970	0.133484	410208	0.131489
pAUDIT	sCCA1	GABA1	1627	911	413595	412833	413559	0.515642	412763	0.53056
pAUDIT	sCCA1	GABA2	1694	907	410871	410068	411574	0.218874	410826	0.201171
pAUDIT	sCCA1	MG	1700	1249	779376	777995	776894	0.976675	775541	0.975531
pAUDIT	sCCA1	NSC	1703	1157	668746	667461	668487	0.588296	667190	0.592478
pAUDIT	sCCA1	ODC1	1637	1164	676866	675748	674821	0.960687	673688	0.961883
pAUDIT	sCCA1	OPC	1673	1022	521731	520962	522603	0.196589	521802	0.205187
pAUDIT	sCCA1	PI_genes	3373	2015	2029105	2025550	2.02986e+06	0.353061	2.02609e+06	0.394168
pAUDIT	sCCA1	PIxASC1	323	182	16471	16443	16530.4	0.370584	16497	0.381764
pAUDIT	sCCA1	PIxASC2	300	164	13366	13351	13428.1	0.350782	13413.3	0.35018
pAUDIT	sCCA1	PIxEND	363	243	29403	29352	29101.6	0.893309	29066.5	0.880893
pAUDIT	sCCA1	PIxexCA1	403	215	23005	22966	23000.9	0.506407	22953.5	0.521952
pAUDIT	sCCA1	PIxexCA3	405	219	23871	23831	23743	0.720387	23683.1	0.750474
pAUDIT	sCCA1	PIxexDG	418	225	25200	25151	25096.2	0.67718	25026.4	0.709969
pAUDIT	sCCA1	PIxexPFC1	359	171	14535	14504	14411.1	0.76577	14378.2	0.769338
pAUDIT	sCCA1	PIxexPFC2	313	170	14365	14341	14197.9	0.837912	14180.7	0.827976
pAUDIT	sCCA1	PIxGABA1	379	176	15400	15372	15583.5	0.147916	15549.9	0.155196
pAUDIT	sCCA1	PIxGABA2	467	223	24753	24701	24644.5	0.686319	24590.5	0.689721
pAUDIT	sCCA1	PIxMG	366	241	28920	28876	28728.1	0.78725	28661.4	0.813889
pAUDIT	sCCA1	PIxNSC	269	165	13530	13511	13763.5	0.0784444	13745.2	0.0777099
pAUDIT	sCCA1	PIxODC1	364	244	29646	29605	29636.5	0.514464	29596.2	0.513347
pAUDIT	sCCA1	PIxOPC	349	184	16836	16805	16972.7	0.227704	16945.5	0.221199
pAUDIT	sCCA2	ASC1	1646	1047	547581	546590	548732	0.135717	547801	0.123376
pAUDIT	sCCA2	ASC2	1668	1038	538203	537187	538888	0.254563	537846	0.262384
pAUDIT	sCCA2	END	1828	1204	724206	722531	726276	0.0428233	724523	0.0488448
pAUDIT	sCCA2	exCA1	1622	884	390286	389384	388767	0.9574	387822	0.961806
pAUDIT	sCCA2	exCA3	1620	875	382375	381519	382512	0.437439	381600	0.46266
pAUDIT	sCCA2	exDG	1595	855	365085	364382	365473	0.324669	364779	0.320622
pAUDIT	sCCA2	exPFC1	1546	781	304590	303999	304178	0.701101	303598	0.696078
pAUDIT	sCCA2	exPFC2	1574	867	375411	374701	374411	0.875849	373724	0.87046
pAUDIT	sCCA2	GABA1	1627	869	377146	376454	378155	0.122832	377492	0.115883
pAUDIT	sCCA2	GABA2	1694	858	367653	366945	368727	0.105231	368062	0.0962407
pAUDIT	sCCA2	MG	1700	1181	696790	695567	697839	0.187161	696691	0.170214
pAUDIT	sCCA2	NSC	1703	1101	605550	604409	605048	0.675599	603863	0.690079
pAUDIT	sCCA2	ODC1	1637	1096	600060	599089	600851	0.235066	599893	0.231231
pAUDIT	sCCA2	OPC	1673	966	466095	465395	468852	0.00218095	468227	0.00169177
pAUDIT	sCCA2	PI_genes	3373	1861	1728870	1725851	1.72534e+06	0.971131	1.7222e+06	0.975326
pAUDIT	sCCA2	PIxASC1	323	171	14535	14509	14574.6	0.40683	14547.1	0.410071
pAUDIT	sCCA2	PIxASC2	300	156	12090	12076	12190.1	0.259052	12181.5	0.247849
pAUDIT	sCCA2	PIxEND	363	228	25878	25833	25973.7	0.336178	25919.3	0.351135
pAUDIT	sCCA2	PIxexCA1	403	202	20301	20267	20385.2	0.336986	20337.2	0.362642
pAUDIT	sCCA2	PIxexCA3	405	205	20910	20874	21054.6	0.239249	21013.3	0.247086
pAUDIT	sCCA2	PIxexDG	418	202	20301	20272	20406	0.300301	20379.5	0.295873
pAUDIT	sCCA2	PIxexPFC1	359	159	12561	12535	12609.4	0.378536	12591.5	0.359161
pAUDIT	sCCA2	PIxexPFC2	313	158	12403	12384	12419.3	0.457077	12406.7	0.440979
pAUDIT	sCCA2	PIxGABA1	379	165	13530	13504	13315.4	0.904443	13292.4	0.901557
pAUDIT	sCCA2	PIxGABA2	467	199	19701	19662	19785.6	0.33392	19746.8	0.333398
pAUDIT	sCCA2	PIxMG	366	222	24531	24496	24651	0.293325	24628.3	0.274363
pAUDIT	sCCA2	PIxNSC	269	152	11476	11462	11324.2	0.841908	11315.4	0.833502
pAUDIT	sCCA2	PIxODC1	364	227	25651	25614	25435	0.829811	25407	0.81966
pAUDIT	sCCA2	PIxOPC	349	169	14196	14171	14173	0.55266	14147.3	0.554473
pAUDIT	sCCA3	ASC1	1646	1009	508536	507615	508218	0.623365	507290	0.626149
pAUDIT	sCCA3	ASC2	1668	992	491536	490628	492491	0.167711	491510	0.186703
pAUDIT	sCCA3	END	1828	1150	660675	659145	663205	0.0139425	661621	0.0155892
pAUDIT	sCCA3	exCA1	1622	834	347361	346553	346929	0.69748	346078	0.715539
pAUDIT	sCCA3	exCA3	1620	843	354903	354075	354477	0.693097	353638	0.697857
pAUDIT	sCCA3	exDG	1595	828	342378	341712	342547	0.418793	341829	0.443233
pAUDIT	sCCA3	exPFC1	1546	763	290703	290126	290243	0.726838	289667	0.726416
pAUDIT	sCCA3	exPFC2	1574	844	355746	355089	355679	0.531201	355092	0.49821
pAUDIT	sCCA3	GABA1	1627	840	351541	350896	351530	0.504714	350937	0.480203
pAUDIT	sCCA3	GABA2	1694	835	348195	347516	348948	0.183383	348249	0.189538
pAUDIT	sCCA3	MG	1700	1133	641278	640115	638265	0.996145	637094	0.996246
pAUDIT	sCCA3	NSC	1703	1054	554931	553938	557180	0.0164962	556111	0.0195898
pAUDIT	sCCA3	ODC1	1637	1056	557040	556112	552854	0.999965	551938	0.999964
pAUDIT	sCCA3	OPC	1673	940	441330	440652	441970	0.247712	441348	0.22898
pAUDIT	sCCA3	PI_genes	3373	1766	1558495	1555797	1.55781e+06	0.650553	1.55509e+06	0.65575
pAUDIT	sCCA3	PIxASC1	323	155	11935	11915	12170.4	0.064502	12143.8	0.0698358
pAUDIT	sCCA3	PIxASC2	300	138	9453	9441	9759.48	0.0135473	9743.39	0.0145407
pAUDIT	sCCA3	PIxEND	363	218	23653	23613	23696.9	0.418959	23660.5	0.412386
pAUDIT	sCCA3	PIxexCA1	403	184	16836	16802	16876.9	0.410466	16823.6	0.451574
pAUDIT	sCCA3	PIxexCA3	405	193	18528	18494	18779.7	0.0958883	18746	0.0954263
pAUDIT	sCCA3	PIxexDG	418	194	18721	18691	18855.6	0.242757	18822.2	0.248098
pAUDIT	sCCA3	PIxexPFC1	359	157	12246	12222	12119.3	0.790468	12081.4	0.815563
pAUDIT	sCCA3	PIxexPFC2	313	150	11175	11157	11067.4	0.763582	11043.5	0.775829
pAUDIT	sCCA3	PIxGABA1	379	155	11935	11912	11809.1	0.792057	11791.2	0.782506
pAUDIT	sCCA3	PIxGABA2	467	187	17391	17354	17658	0.0766858	17625.3	0.0732459
pAUDIT	sCCA3	PIxMG	366	213	22578	22538	22440.1	0.741257	22382.6	0.767422
pAUDIT	sCCA3	PIxNSC	269	141	9870	9858	10191	0.0117479	10175.3	0.0125238
pAUDIT	sCCA3	PIxODC1	364	211	22155	22124	21965.2	0.816288	21939.9	0.809066
pAUDIT	sCCA3	PIxOPC	349	163	13203	13177	13237.7	0.413826	13215	0.40589
psychiatric	cortex.PEC	ASC1	1800	1211	732655	731541	734141	0.109869	733072	0.102931
psychiatric	cortex.PEC	ASC2	1817	1184	700336	699226	700645	0.396948	699491	0.411227
psychiatric	cortex.PEC	END	1888	1107	612171	611101	614520	0.0169508	613349	0.0211096
psychiatric	cortex.PEC	exCA1	1812	1170	683865	682767	685483	0.0833446	684230	0.105383
psychiatric	cortex.PEC	exCA3	1788	1159	671061	669973	670414	0.711746	669217	0.74307
psychiatric	cortex.PEC	exDG	1766	1151	661825	660829	661390	0.647213	660434	0.634345
psychiatric	cortex.PEC	exPFC1	1748	1186	702705	701790	701853	0.763836	700940	0.763428
psychiatric	cortex.PEC	exPFC2	1754	1208	729028	728078	726862	0.963704	725887	0.965414
psychiatric	cortex.PEC	GABA1	1804	1148	658378	657433	661156	0.00779608	660231	0.00739976
psychiatric	cortex.PEC	GABA2	1817	1120	626640	625787	628417	0.0562905	627573	0.0552987
psychiatric	cortex.PEC	MG	1819	1163	675703	674667	678683	0.00522892	677603	0.00578817
psychiatric	cortex.PEC	NSC	1801	1179	694431	693449	693647	0.746905	692583	0.768981
psychiatric	cortex.PEC	ODC1	1757	1201	720600	719572	722330	0.074862	721273	0.0782258
psychiatric	cortex.PEC	OPC	1800	1140	649230	648437	651069	0.0533502	650219	0.0589461
psychiatric	cortex.PEC	PI_genes	3524	1742	1516411	1514376	1.52092e+06	0.00485665	1.51873e+06	0.00625391
psychiatric	cortex.PEC	PIxASC1	344	172	14706	14688	14892.7	0.138347	14876.5	0.1359
psychiatric	cortex.PEC	PIxASC2	325	150	11175	11166	11079.3	0.738178	11070.3	0.738165
psychiatric	cortex.PEC	PIxEND	390	204	20706	20679	20490.1	0.855726	20470.3	0.84761
psychiatric	cortex.PEC	PIxexCA1	433	230	26335	26302	26954.2	0.00367883	26918.2	0.00380644
psychiatric	cortex.PEC	PIxexCA3	416	232	26796	26754	26760.5	0.559896	26722.2	0.553512
psychiatric	cortex.PEC	PIxexDG	441	239	28441	28401	28533.9	0.347517	28489.3	0.35457
psychiatric	cortex.PEC	PIxexPFC1	363	216	23220	23199	23115.3	0.685545	23092.8	0.688142
psychiatric	cortex.PEC	PIxexPFC2	315	214	22791	22770	22713.1	0.641421	22690.7	0.643846
psychiatric	cortex.PEC	PIxGABA1	401	198	19503	19481	19625.1	0.267568	19610.1	0.255965
psychiatric	cortex.PEC	PIxGABA2	503	247	30381	30345	30379.9	0.500644	30338.2	0.510009
psychiatric	cortex.PEC	PIxMG	373	203	20503	20473	20787.9	0.0802049	20753.1	0.0835776
psychiatric	cortex.PEC	PIxNSC	291	144	10296	10284	10474.8	0.106871	10462.3	0.107282
psychiatric	cortex.PEC	PIxODC1	372	234	27261	27233	27335.4	0.374064	27303	0.381141
psychiatric	cortex.PEC	PIxOPC	387	181	16290	16271	16642.9	0.0259039	16620.4	0.0269945
psychiatric	sCCA1	ASC1	1646	1095	598965	597880	598114	0.781545	596913	0.811771
psychiatric	sCCA1	ASC2	1668	1087	589155	588056	590198	0.168317	589104	0.166858
psychiatric	sCCA1	END	1828	1270	805815	803930	806078	0.417819	804098	0.446989
psychiatric	sCCA1	exCA1	1622	918	420903	419929	422467	0.0442579	421308	0.0662933
psychiatric	sCCA1	exCA3	1620	913	416328	415355	417700	0.0664244	416636	0.0800557
psychiatric	sCCA1	exDG	1595	901	405450	404604	405367	0.536371	404498	0.546807
psychiatric	sCCA1	exPFC1	1546	816	332520	331863	333670	0.079336	333062	0.0706671
psychiatric	sCCA1	exPFC2	1574	906	409965	409195	410592	0.244075	409867	0.228692
psychiatric	sCCA1	GABA1	1627	911	413595	412833	414837	0.0860841	414074	0.0860328
psychiatric	sCCA1	GABA2	1694	907	410871	410068	411578	0.217581	410794	0.211433
psychiatric	sCCA1	MG	1700	1249	779376	777995	780424	0.200622	778893	0.235734
psychiatric	sCCA1	NSC	1703	1157	668746	667461	669887	0.161901	668612	0.159562
psychiatric	sCCA1	ODC1	1637	1164	676866	675748	679983	0.00373225	678869	0.00367347
psychiatric	sCCA1	OPC	1673	1022	521731	520962	522968	0.113098	522148	0.122599
psychiatric	sCCA1	PI_genes	3373	2015	2029105	2025550	2.03256e+06	0.0434309	2.02899e+06	0.0439903
psychiatric	sCCA1	PIxASC1	323	182	16471	16443	16506.7	0.420693	16485.5	0.406089
psychiatric	sCCA1	PIxASC2	300	164	13366	13351	13145.1	0.912244	13138.6	0.903674
psychiatric	sCCA1	PIxEND	363	243	29403	29352	29317.2	0.637364	29281.7	0.613162
psychiatric	sCCA1	PIxexCA1	403	215	23005	22966	23077.6	0.366554	23030.5	0.38066
psychiatric	sCCA1	PIxexCA3	405	219	23871	23831	23906.6	0.434089	23866.5	0.434318
psychiatric	sCCA1	PIxexDG	418	225	25200	25151	24956.2	0.861339	24911.4	0.857372
psychiatric	sCCA1	PIxexPFC1	359	171	14535	14504	14581.9	0.390343	14554.8	0.381477
psychiatric	sCCA1	PIxexPFC2	313	170	14365	14341	14486.8	0.235526	14462.9	0.235198
psychiatric	sCCA1	PIxGABA1	379	176	15400	15372	15349.3	0.612228	15326.9	0.600197
psychiatric	sCCA1	PIxGABA2	467	223	24753	24701	24893.8	0.262878	24855	0.243663
psychiatric	sCCA1	PIxMG	366	241	28920	28876	28664.2	0.856367	28619.4	0.857299
psychiatric	sCCA1	PIxNSC	269	165	13530	13511	13444.9	0.696584	13428.5	0.691005
psychiatric	sCCA1	PIxODC1	364	244	29646	29605	29712.6	0.391224	29677.7	0.381626
psychiatric	sCCA1	PIxOPC	349	184	16836	16805	16965.4	0.239729	16942.3	0.22652
psychiatric	sCCA2	ASC1	1646	1047	547581	546590	547796	0.418444	546790	0.423967
psychiatric	sCCA2	ASC2	1668	1038	538203	537187	536687	0.928074	535673	0.927989
psychiatric	sCCA2	END	1828	1204	724206	722531	725651	0.115006	723950	0.119004
psychiatric	sCCA2	exCA1	1622	884	390286	389384	391646	0.0619776	390683	0.0706214
psychiatric	sCCA2	exCA3	1620	875	382375	381519	383025	0.228588	382115	0.247397
psychiatric	sCCA2	exDG	1595	855	365085	364382	365346	0.379954	364616	0.391893
psychiatric	sCCA2	exPFC1	1546	781	304590	303999	304039	0.759922	303432	0.766456
psychiatric	sCCA2	exPFC2	1574	867	375411	374701	373718	0.974758	372955	0.978275
psychiatric	sCCA2	GABA1	1627	869	377146	376454	377386	0.390761	376711	0.383277
psychiatric	sCCA2	GABA2	1694	858	367653	366945	366617	0.88657	365907	0.887151
psychiatric	sCCA2	MG	1700	1181	696790	695567	697489	0.276635	696265	0.276943
psychiatric	sCCA2	NSC	1703	1101	605550	604409	605850	0.392456	604759	0.37505
psychiatric	sCCA2	ODC1	1637	1096	600060	599089	601016	0.191354	600092	0.179749
psychiatric	sCCA2	OPC	1673	966	466095	465395	467839	0.035564	467180	0.0322458
psychiatric	sCCA2	PI_genes	3373	1861	1728870	1725851	1.73146e+06	0.0822497	1.72827e+06	0.0960696
psychiatric	sCCA2	PIxASC1	323	171	14535	14509	14753.8	0.100108	14732.1	0.0955969
psychiatric	sCCA2	PIxASC2	300	156	12090	12076	12154.4	0.338149	12146.1	0.324795
psychiatric	sCCA2	PIxEND	363	228	25878	25833	26106.3	0.157785	26064.8	0.153888
psychiatric	sCCA2	PIxexCA1	403	202	20301	20267	20348	0.406534	20314	0.406491
psychiatric	sCCA2	PIxexCA3	405	205	20910	20874	20825.1	0.659963	20790.5	0.657563
psychiatric	sCCA2	PIxexDG	418	202	20301	20272	20070.7	0.873719	20037.3	0.878324
psychiatric	sCCA2	PIxexPFC1	359	159	12561	12535	12780.1	0.083992	12759.7	0.078565
psychiatric	sCCA2	PIxexPFC2	313	158	12403	12384	12448.7	0.384327	12430	0.383625
psychiatric	sCCA2	PIxGABA1	379	165	13530	13504	13580.4	0.378358	13564.3	0.355454
psychiatric	sCCA2	PIxGABA2	467	199	19701	19662	19551.4	0.773966	19525.4	0.754001
psychiatric	sCCA2	PIxMG	366	222	24531	24496	24460.7	0.623455	24416.7	0.638967
psychiatric	sCCA2	PIxNSC	269	152	11476	11462	11409.7	0.667779	11404.3	0.646958
psychiatric	sCCA2	PIxODC1	364	227	25651	25614	25857.2	0.181148	25808.1	0.195343
psychiatric	sCCA2	PIxOPC	349	169	14196	14171	14337.1	0.20086	14301.4	0.21881
psychiatric	sCCA3	ASC1	1646	1009	508536	507615	508762	0.411104	507829	0.415585
psychiatric	sCCA3	ASC2	1668	992	491536	490628	492086	0.289383	491201	0.281277
psychiatric	sCCA3	END	1828	1150	660675	659145	663899	0.00254836	662206	0.00387727
psychiatric	sCCA3	exCA1	1622	834	347361	346553	347576	0.397819	346689	0.43465
psychiatric	sCCA3	exCA3	1620	843	354903	354075	354428	0.713553	353510	0.749038
psychiatric	sCCA3	exDG	1595	828	342378	341712	342598	0.394851	341899	0.410033
psychiatric	sCCA3	exPFC1	1546	763	290703	290126	290661	0.521647	290144	0.490376
psychiatric	sCCA3	exPFC2	1574	844	355746	355089	355599	0.568874	354937	0.571288
psychiatric	sCCA3	GABA1	1627	840	351541	350896	352684	0.0865665	352041	0.0858817
psychiatric	sCCA3	GABA2	1694	835	348195	347516	347571	0.772716	346929	0.75929
psychiatric	sCCA3	MG	1700	1133	641278	640115	643148	0.049425	641914	0.0559782
psychiatric	sCCA3	NSC	1703	1054	554931	553938	554836	0.535681	553841	0.536369
psychiatric	sCCA3	ODC1	1637	1056	557040	556112	559669	0.00643367	558721	0.00675004
psychiatric	sCCA3	OPC	1673	940	441330	440652	442646	0.0807356	441966	0.0809467
psychiatric	sCCA3	PI_genes	3373	1766	1558495	1555797	1.56244e+06	0.0126831	1.55986e+06	0.0107448
psychiatric	sCCA3	PIxASC1	323	155	11935	11915	11877.6	0.643559	11856.3	0.646816
psychiatric	sCCA3	PIxASC2	300	138	9453	9441	9486.68	0.401488	9479.29	0.388531
psychiatric	sCCA3	PIxEND	363	218	23653	23613	23741.7	0.340739	23687.5	0.364866
psychiatric	sCCA3	PIxexCA1	403	184	16836	16802	16865.6	0.434635	16822.5	0.4541
psychiatric	sCCA3	PIxexCA3	405	193	18528	18494	18681.6	0.212058	18645	0.215851
psychiatric	sCCA3	PIxexDG	418	194	18721	18691	19003.8	0.0724693	18969	0.0757869
psychiatric	sCCA3	PIxexPFC1	359	157	12246	12222	12371.6	0.210714	12338.1	0.228305
psychiatric	sCCA3	PIxexPFC2	313	150	11175	11157	11190	0.45822	11172.1	0.458081
psychiatric	sCCA3	PIxGABA1	379	155	11935	11912	11929.4	0.512844	11909.9	0.503603
psychiatric	sCCA3	PIxGABA2	467	187	17391	17354	17460.4	0.353739	17429.6	0.341339
psychiatric	sCCA3	PIxMG	366	213	22578	22538	22672	0.328219	22632	0.327998
psychiatric	sCCA3	PIxNSC	269	141	9870	9858	9996.08	0.184502	9983.78	0.184926
psychiatric	sCCA3	PIxODC1	364	211	22155	22124	22175.2	0.460518	22141.5	0.465674
psychiatric	sCCA3	PIxOPC	349	163	13203	13177	13316.7	0.241334	13297	0.22938
sc	cortex.PEC	ASC1	1800	1211	732655	731541	733262	0.30776	732195	0.294261
sc	cortex.PEC	ASC2	1817	1184	700336	699226	701060	0.270334	699967	0.265265
sc	cortex.PEC	END	1888	1107	612171	611101	609991	0.975701	608953	0.974094
sc	cortex.PEC	exCA1	1812	1170	683865	682767	684441	0.310898	683351	0.308619
sc	cortex.PEC	exCA3	1788	1159	671061	669973	668841	0.972414	667723	0.974118
sc	cortex.PEC	exDG	1766	1151	661825	660829	662129	0.395759	661119	0.400171
sc	cortex.PEC	exPFC1	1748	1186	702705	701790	704365	0.0807934	703435	0.0825913
sc	cortex.PEC	exPFC2	1754	1208	729028	728078	729967	0.218374	729023	0.216771
sc	cortex.PEC	GABA1	1804	1148	658378	657433	658990	0.2969	658119	0.274825
sc	cortex.PEC	GABA2	1817	1120	626640	625787	627659	0.181334	626823	0.177227
sc	cortex.PEC	MG	1819	1163	675703	674667	678905	0.00297165	677848	0.00311875
sc	cortex.PEC	NSC	1801	1179	694431	693449	696116	0.0765213	695204	0.0682075
sc	cortex.PEC	ODC1	1757	1201	720600	719572	721159	0.320601	720136	0.319099
sc	cortex.PEC	OPC	1800	1140	649230	648437	648755	0.661363	647969	0.659222
sc	cortex.PEC	PI_genes	3524	1742	1516411	1514376	1.51828e+06	0.141326	1.51623e+06	0.143564
sc	cortex.PEC	PIxASC1	344	172	14706	14688	14577.1	0.773402	14565.8	0.761443
sc	cortex.PEC	PIxASC2	325	150	11175	11166	11092.1	0.709278	11086.9	0.700585
sc	cortex.PEC	PIxEND	390	204	20706	20679	21081.5	0.0330656	21057.2	0.0320155
sc	cortex.PEC	PIxexCA1	433	230	26335	26302	25921.7	0.96465	25902.1	0.959888
sc	cortex.PEC	PIxexCA3	416	232	26796	26754	26791	0.5075	26747.9	0.509349
sc	cortex.PEC	PIxexDG	441	239	28441	28401	28559.8	0.308481	28519.7	0.308472
sc	cortex.PEC	PIxexPFC1	363	216	23220	23199	23435.2	0.158955	23407.8	0.166165
sc	cortex.PEC	PIxexPFC2	315	214	22791	22770	22975.8	0.193162	22946.7	0.203532
sc	cortex.PEC	PIxGABA1	401	198	19503	19481	19429.1	0.644846	19409.4	0.640544
sc	cortex.PEC	PIxGABA2	503	247	30381	30345	30644.2	0.142895	30603.7	0.146866
sc	cortex.PEC	PIxMG	373	203	20503	20473	21004.8	0.00691701	20972	0.00715622
sc	cortex.PEC	PIxNSC	291	144	10296	10284	10185	0.779825	10176.9	0.771745
sc	cortex.PEC	PIxODC1	372	234	27261	27233	27344.5	0.359387	27319	0.355322
sc	cortex.PEC	PIxOPC	387	181	16290	16271	16208.4	0.673322	16173.1	0.705366
sc	sCCA1	ASC1	1646	1095	598965	597880	598827	0.549978	597689	0.569176
sc	sCCA1	ASC2	1668	1087	589155	588056	588179	0.815722	587044	0.824663
sc	sCCA1	END	1828	1270	805815	803930	804048	0.918146	802110	0.924515
sc	sCCA1	exCA1	1622	918	420903	419929	421762	0.174573	420703	0.19914
sc	sCCA1	exCA3	1620	913	416328	415355	415622	0.780325	414674	0.772464
sc	sCCA1	exDG	1595	901	405450	404604	405743	0.372126	404885	0.377093
sc	sCCA1	exPFC1	1546	816	332520	331863	331300	0.932882	330586	0.941575
sc	sCCA1	exPFC2	1574	906	409965	409195	410415	0.309443	409636	0.312793
sc	sCCA1	GABA1	1627	911	413595	412833	412039	0.956531	411296	0.954797
sc	sCCA1	GABA2	1694	907	410871	410068	409693	0.903179	408791	0.920832
sc	sCCA1	MG	1700	1249	779376	777995	781531	0.0422479	780084	0.0470614
sc	sCCA1	NSC	1703	1157	668746	667461	670476	0.0674728	669174	0.0692143
sc	sCCA1	ODC1	1637	1164	676866	675748	678100	0.144369	676935	0.153674
sc	sCCA1	OPC	1673	1022	521731	520962	521114	0.726898	520423	0.701217
sc	sCCA1	PI_genes	3373	2015	2029105	2025550	2.02929e+06	0.46324	2.02549e+06	0.510857
sc	sCCA1	PIxASC1	323	182	16471	16443	16404.4	0.641941	16386.5	0.620987
sc	sCCA1	PIxASC2	300	164	13366	13351	13291.7	0.674133	13284.9	0.655803
sc	sCCA1	PIxEND	363	243	29403	29352	29543.8	0.280101	29479.5	0.298694
sc	sCCA1	PIxexCA1	403	215	23005	22966	22649.8	0.951699	22613.5	0.95053
sc	sCCA1	PIxexCA3	405	219	23871	23831	23948.3	0.360705	23917.4	0.345238
sc	sCCA1	PIxexDG	418	225	25200	25151	25020	0.788343	24981.7	0.774451
sc	sCCA1	PIxexPFC1	359	171	14535	14504	14759.7	0.0942427	14718.4	0.104461
sc	sCCA1	PIxexPFC2	313	170	14365	14341	14426.7	0.356601	14399.6	0.363322
sc	sCCA1	PIxGABA1	379	176	15400	15372	15316.9	0.680963	15288.6	0.681768
sc	sCCA1	PIxGABA2	467	223	24753	24701	24829.5	0.364501	24782.4	0.356127
sc	sCCA1	PIxMG	366	241	28920	28876	29493.8	0.00882247	29436.9	0.0101224
sc	sCCA1	PIxNSC	269	165	13530	13511	13377.1	0.823483	13365.8	0.811154
sc	sCCA1	PIxODC1	364	244	29646	29605	29754.8	0.32676	29711.9	0.329486
sc	sCCA1	PIxOPC	349	184	16836	16805	17064.2	0.107158	17023.4	0.117053
sc	sCCA2	ASC1	1646	1047	547581	546590	549553	0.0298586	548553	0.0303202
sc	sCCA2	ASC2	1668	1038	538203	537187	540180	0.0284734	539143	0.02971
sc	sCCA2	END	1828	1204	724206	722531	723364	0.757929	721600	0.780502
sc	sCCA2	exCA1	1622	884	390286	389384	390596	0.36249	389715	0.353608
sc	sCCA2	exCA3	1620	875	382375	381519	381628	0.803517	380848	0.778622
sc	sCCA2	exDG	1595	855	365085	364382	364444	0.773256	363709	0.784622
sc	sCCA2	exPFC1	1546	781	304590	303999	301945	0.999661	301344	0.99968
sc	sCCA2	exPFC2	1574	867	375411	374701	372929	0.997945	372139	0.998487
sc	sCCA2	GABA1	1627	869	377146	376454	376521	0.764166	375864	0.751457
sc	sCCA2	GABA2	1694	858	367653	366945	367642	0.504641	366926	0.508478
sc	sCCA2	MG	1700	1181	696790	695567	696956	0.443797	695778	0.428666
sc	sCCA2	NSC	1703	1101	605550	604409	609298	0.000337932	608067	0.000449005
sc	sCCA2	ODC1	1637	1096	600060	599089	600708	0.277039	599654	0.302645
sc	sCCA2	OPC	1673	966	466095	465395	464553	0.944972	463836	0.947034
sc	sCCA2	PI_genes	3373	1861	1728870	1725851	1.72907e+06	0.457234	1.72586e+06	0.497677
sc	sCCA2	PIxASC1	323	171	14535	14509	14463.4	0.661562	14443.1	0.649314
sc	sCCA2	PIxASC2	300	156	12090	12076	12195	0.24909	12180.8	0.249238
sc	sCCA2	PIxEND	363	228	25878	25833	26423.8	0.0085331	26357.6	0.0108549
sc	sCCA2	PIxexCA1	403	202	20301	20267	20142.1	0.784418	20115.1	0.774312
sc	sCCA2	PIxexCA3	405	205	20910	20874	21026.4	0.283829	20996.1	0.274333
sc	sCCA2	PIxexDG	418	202	20301	20272	20373.3	0.358719	20347.7	0.352444
sc	sCCA2	PIxexPFC1	359	159	12561	12535	12392.2	0.856664	12369.3	0.852425
sc	sCCA2	PIxexPFC2	313	158	12403	12384	12388.9	0.533946	12366.2	0.543297
sc	sCCA2	PIxGABA1	379	165	13530	13504	13457.2	0.669834	13417.7	0.699224
sc	sCCA2	PIxGABA2	467	199	19701	19662	19483	0.864155	19447.3	0.860648
sc	sCCA2	PIxMG	366	222	24531	24496	24808.9	0.105125	24775.9	0.103348
sc	sCCA2	PIxNSC	269	152	11476	11462	11401.7	0.686982	11387.9	0.686609
sc	sCCA2	PIxODC1	364	227	25651	25614	25901.3	0.134709	25869.7	0.129467
sc	sCCA2	PIxOPC	349	169	14196	14171	13958.3	0.921393	13924.4	0.929169
sc	sCCA3	ASC1	1646	1009	508536	507615	509942	0.0817052	509026	0.08074
sc	sCCA3	ASC2	1668	992	491536	490628	491015	0.700172	489966	0.747782
sc	sCCA3	END	1828	1150	660675	659145	659466	0.85352	657948	0.85137
sc	sCCA3	exCA1	1622	834	347361	346553	349177	0.0147646	348268	0.0198414
sc	sCCA3	exCA3	1620	843	354903	354075	355521	0.231656	354708	0.225691
sc	sCCA3	exDG	1595	828	342378	341712	344491	0.00539589	343781	0.0062399
sc	sCCA3	exPFC1	1546	763	290703	290126	292020	0.0422726	291440	0.0423982
sc	sCCA3	exPFC2	1574	844	355746	355089	356539	0.173554	355874	0.175828
sc	sCCA3	GABA1	1627	840	351541	350896	350770	0.821088	350088	0.832656
sc	sCCA3	GABA2	1694	835	348195	347516	347209	0.881271	346468	0.895798
sc	sCCA3	MG	1700	1133	641278	640115	642331	0.17617	641073	0.198542
sc	sCCA3	NSC	1703	1054	554931	553938	556043	0.145668	554929	0.173086
sc	sCCA3	ODC1	1637	1056	557040	556112	555358	0.944568	554464	0.94101
sc	sCCA3	OPC	1673	940	441330	440652	441875	0.280712	441273	0.253893
sc	sCCA3	PI_genes	3373	1766	1558495	1555797	1.56258e+06	0.010457	1.55993e+06	0.00955537
sc	sCCA3	PIxASC1	323	155	11935	11915	12027.5	0.273828	12007.3	0.274079
sc	sCCA3	PIxASC2	300	138	9453	9441	9572.94	0.191208	9564.94	0.183289
sc	sCCA3	PIxEND	363	218	23653	23613	24031.1	0.0415923	24000.8	0.0377137
sc	sCCA3	PIxexCA1	403	184	16836	16802	17024	0.152771	16977.6	0.168958
sc	sCCA3	PIxexCA3	405	193	18528	18494	18896.5	0.028383	18862.2	0.0283618
sc	sCCA3	PIxexDG	418	194	18721	18691	18808.9	0.323893	18783.7	0.314864
sc	sCCA3	PIxexPFC1	359	157	12246	12222	12275.5	0.423658	12255.8	0.412948
sc	sCCA3	PIxexPFC2	313	150	11175	11157	11314.2	0.175742	11297	0.174257
sc	sCCA3	PIxGABA1	379	155	11935	11912	12189.8	0.0502841	12162.5	0.0530434
sc	sCCA3	PIxGABA2	467	187	17391	17354	17789.7	0.0167894	17753.7	0.0164721
sc	sCCA3	PIxMG	366	213	22578	22538	22840.8	0.108422	22787.8	0.119893
sc	sCCA3	PIxNSC	269	141	9870	9858	9816.37	0.647157	9808.24	0.636911
sc	sCCA3	PIxODC1	364	211	22155	22124	22527.6	0.03893	22496.1	0.0390204
sc	sCCA3	PIxOPC	349	163	13203	13177	13334.4	0.208964	13313	0.200777
si	cortex.PEC	ASC1	1800	1211	732655	731541	732579	0.524927	731352	0.561725
si	cortex.PEC	ASC2	1817	1184	700336	699226	699882	0.649321	698631	0.692321
si	cortex.PEC	END	1888	1107	612171	611101	613150	0.18813	611953	0.220333
si	cortex.PEC	exCA1	1812	1170	683865	682767	682941	0.785166	681827	0.789257
si	cortex.PEC	exCA3	1788	1159	671061	669973	672901	0.0562265	671756	0.0618244
si	cortex.PEC	exDG	1766	1151	661825	660829	662426	0.300518	661381	0.315389
si	cortex.PEC	exPFC1	1748	1186	702705	701790	705024	0.0253331	704025	0.0297343
si	cortex.PEC	exPFC2	1754	1208	729028	728078	728908	0.539508	727790	0.593956
si	cortex.PEC	GABA1	1804	1148	658378	657433	658692	0.392108	657692	0.410542
si	cortex.PEC	GABA2	1817	1120	626640	625787	626394	0.586608	625535	0.589023
si	cortex.PEC	MG	1819	1163	675703	674667	675158	0.68015	674086	0.691386
si	cortex.PEC	NSC	1801	1179	694431	693449	694972	0.323068	693853	0.365448
si	cortex.PEC	ODC1	1757	1201	720600	719572	718593	0.952823	717495	0.95844
si	cortex.PEC	OPC	1800	1140	649230	648437	649757	0.321555	648947	0.326852
si	cortex.PEC	PI_genes	3524	1742	1516411	1514376	1.51707e+06	0.35207	1.51491e+06	0.378771
si	cortex.PEC	PIxASC1	344	172	14706	14688	14648.5	0.629892	14629.1	0.633149
si	cortex.PEC	PIxASC2	325	150	11175	11166	11179.2	0.487042	11167.3	0.494644
si	cortex.PEC	PIxEND	390	204	20706	20679	20683.6	0.542547	20657.8	0.540311
si	cortex.PEC	PIxexCA1	433	230	26335	26302	26011.9	0.920844	25986.7	0.915788
si	cortex.PEC	PIxexCA3	416	232	26796	26754	26819.1	0.459107	26772.6	0.466887
si	cortex.PEC	PIxexDG	441	239	28441	28401	28297.6	0.725524	28260.8	0.72114
si	cortex.PEC	PIxexPFC1	363	216	23220	23199	23370	0.242744	23348.5	0.243301
si	cortex.PEC	PIxexPFC2	315	214	22791	22770	22857.4	0.376759	22830.9	0.386537
si	cortex.PEC	PIxGABA1	401	198	19503	19481	19594.3	0.320991	19568.2	0.328361
si	cortex.PEC	PIxGABA2	503	247	30381	30345	30604.9	0.181683	30567.2	0.183451
si	cortex.PEC	PIxMG	373	203	20503	20473	20592.9	0.327633	20560.8	0.331234
si	cortex.PEC	PIxNSC	291	144	10296	10284	10383.9	0.269017	10377.1	0.257269
si	cortex.PEC	PIxODC1	372	234	27261	27233	27136.1	0.702928	27103.3	0.710115
si	cortex.PEC	PIxOPC	387	181	16290	16271	15766.5	0.998295	15752.2	0.998155
si	sCCA1	ASC1	1646	1095	598965	597880	600202	0.129275	599017	0.149234
si	sCCA1	ASC2	1668	1087	589155	588056	589670	0.317359	588538	0.328063
si	sCCA1	END	1828	1270	805815	803930	805631	0.557403	803756	0.554455
si	sCCA1	exCA1	1622	918	420903	419929	422468	0.0442087	421376	0.057344
si	sCCA1	exCA3	1620	913	416328	415355	416462	0.44126	415448	0.458971
si	sCCA1	exDG	1595	901	405450	404604	407102	0.0334523	406108	0.0473963
si	sCCA1	exPFC1	1546	816	332520	331863	333824	0.0551057	333083	0.0672886
si	sCCA1	exPFC2	1574	906	409965	409195	411414	0.0549218	410485	0.0770099
si	sCCA1	GABA1	1627	911	413595	412833	414503	0.158977	413745	0.157806
si	sCCA1	GABA2	1694	907	410871	410068	409830	0.874661	408975	0.886418
si	sCCA1	MG	1700	1249	779376	777995	782100	0.0146284	780724	0.0144291
si	sCCA1	NSC	1703	1157	668746	667461	668390	0.620533	667058	0.636151
si	sCCA1	ODC1	1637	1164	676866	675748	679544	0.010736	678445	0.0102395
si	sCCA1	OPC	1673	1022	521731	520962	522623	0.191123	521821	0.199976
si	sCCA1	PI_genes	3373	2015	2029105	2025550	2.03129e+06	0.139006	2.0274e+06	0.179387
si	sCCA1	PIxASC1	323	182	16471	16443	16306.3	0.817785	16285.3	0.807532
si	sCCA1	PIxASC2	300	164	13366	13351	13114.6	0.938623	13084.8	0.949079
si	sCCA1	PIxEND	363	243	29403	29352	29567.8	0.247924	29502.1	0.267186
si	sCCA1	PIxexCA1	403	215	23005	22966	23071.1	0.377938	23030.8	0.38005
si	sCCA1	PIxexCA3	405	219	23871	23831	23750.8	0.708112	23718.5	0.696093
si	sCCA1	PIxexDG	418	225	25200	25151	25097.3	0.675476	25045	0.68099
si	sCCA1	PIxexPFC1	359	171	14535	14504	14404.2	0.778109	14375.3	0.774602
si	sCCA1	PIxexPFC2	313	170	14365	14341	14325.1	0.591721	14303	0.587396
si	sCCA1	PIxGABA1	379	176	15400	15372	15450.6	0.385251	15430.1	0.368825
si	sCCA1	PIxGABA2	467	223	24753	24701	24891.8	0.265718	24850.6	0.249972
si	sCCA1	PIxMG	366	241	28920	28876	29026.1	0.328723	28984	0.325766
si	sCCA1	PIxNSC	269	165	13530	13511	13558	0.430934	13525.9	0.462322
si	sCCA1	PIxODC1	364	244	29646	29605	29375.7	0.866646	29354	0.848902
si	sCCA1	PIxOPC	349	184	16836	16805	16891	0.380916	16846.6	0.408844
si	sCCA2	ASC1	1646	1047	547581	546590	547464	0.544194	546357	0.588109
si	sCCA2	ASC2	1668	1038	538203	537187	536458	0.95381	535329	0.963611
si	sCCA2	END	1828	1204	724206	722531	725169	0.211657	723397	0.235655
si	sCCA2	exCA1	1622	884	390286	389384	389602	0.780564	388688	0.784889
si	sCCA2	exCA3	1620	875	382375	381519	383375	0.126344	382462	0.140172
si	sCCA2	exDG	1595	855	365085	364382	366107	0.115806	365431	0.109636
si	sCCA2	exPFC1	1546	781	304590	303999	305188	0.221767	304509	0.256547
si	sCCA2	exPFC2	1574	867	375411	374701	374671	0.803422	373874	0.83019
si	sCCA2	GABA1	1627	869	377146	376454	377239	0.456952	376553	0.454182
si	sCCA2	GABA2	1694	858	367653	366945	367935	0.370869	367185	0.389492
si	sCCA2	MG	1700	1181	696790	695567	697522	0.267529	696313	0.263535
si	sCCA2	NSC	1703	1101	605550	604409	606101	0.308164	604974	0.303607
si	sCCA2	ODC1	1637	1096	600060	599089	600740	0.267324	599709	0.2855
si	sCCA2	OPC	1673	966	466095	465395	465854	0.598336	465159	0.596523
si	sCCA2	PI_genes	3373	1861	1728870	1725851	1.72436e+06	0.992416	1.72099e+06	0.995586
si	sCCA2	PIxASC1	323	171	14535	14509	14515.5	0.544079	14476.8	0.573526
si	sCCA2	PIxASC2	300	156	12090	12076	12200.3	0.238458	12183.2	0.244478
si	sCCA2	PIxEND	363	228	25878	25833	25988.8	0.312283	25946.3	0.308259
si	sCCA2	PIxexCA1	403	202	20301	20267	19981.8	0.943979	19950.9	0.942381
si	sCCA2	PIxexCA3	405	205	20910	20874	20856.5	0.602095	20821.3	0.600684
si	sCCA2	PIxexDG	418	202	20301	20272	20106.9	0.832261	20076.5	0.834168
si	sCCA2	PIxexPFC1	359	159	12561	12535	12495.6	0.658765	12472.6	0.651944
si	sCCA2	PIxexPFC2	313	158	12403	12384	12010.2	0.994077	11994.7	0.99372
si	sCCA2	PIxGABA1	379	165	13530	13504	13424.7	0.738134	13401	0.733803
si	sCCA2	PIxGABA2	467	199	19701	19662	19661.4	0.577781	19633.7	0.555421
si	sCCA2	PIxMG	366	222	24531	24496	24426.4	0.68077	24383.5	0.69352
si	sCCA2	PIxNSC	269	152	11476	11462	11436.9	0.600342	11419.9	0.607982
si	sCCA2	PIxODC1	364	227	25651	25614	25472.6	0.784192	25419	0.805379
si	sCCA2	PIxOPC	349	169	14196	14171	14094	0.726638	14059.3	0.745709
si	sCCA3	ASC1	1646	1009	508536	507615	506933	0.944144	506032	0.942031
si	sCCA3	ASC2	1668	992	491536	490628	491045	0.689694	490130	0.692403
si	sCCA3	END	1828	1150	660675	659145	660791	0.459651	659172	0.490256
si	sCCA3	exCA1	1622	834	347361	346553	348145	0.173329	347315	0.179864
si	sCCA3	exCA3	1620	843	354903	354075	353885	0.886609	353009	0.897556
si	sCCA3	exDG	1595	828	342378	341712	343333	0.124328	342619	0.136358
si	sCCA3	exPFC1	1546	763	290703	290126	290322	0.690912	289714	0.705541
si	sCCA3	exPFC2	1574	844	355746	355089	357614	0.0135064	356854	0.018254
si	sCCA3	GABA1	1627	840	351541	350896	351403	0.564823	350774	0.557417
si	sCCA3	GABA2	1694	835	348195	347516	347736	0.708531	346970	0.743526
si	sCCA3	MG	1700	1133	641278	640115	642024	0.254943	640842	0.260103
si	sCCA3	NSC	1703	1054	554931	553938	554339	0.712904	553337	0.715871
si	sCCA3	ODC1	1637	1056	557040	556112	557150	0.458091	556278	0.437276
si	sCCA3	OPC	1673	940	441330	440652	441560	0.403166	440838	0.421062
si	sCCA3	PI_genes	3373	1766	1558495	1555797	1.55532e+06	0.963818	1.55237e+06	0.973971
si	sCCA3	PIxASC1	323	155	11935	11915	11770.7	0.856357	11746.4	0.862779
si	sCCA3	PIxASC2	300	138	9453	9441	9597.54	0.146688	9576.87	0.161352
si	sCCA3	PIxEND	363	218	23653	23613	23182.7	0.985142	23140.4	0.985602
si	sCCA3	PIxexCA1	403	184	16836	16802	16649.9	0.844825	16620.7	0.838629
si	sCCA3	PIxexCA3	405	193	18528	18494	18423.7	0.7051	18396.5	0.693031
si	sCCA3	PIxexDG	418	194	18721	18691	18627	0.68551	18603.2	0.674138
si	sCCA3	PIxexPFC1	359	157	12246	12222	12445	0.102239	12419.3	0.10388
si	sCCA3	PIxexPFC2	313	150	11175	11157	11076.1	0.745143	11045.3	0.772063
si	sCCA3	PIxGABA1	379	155	11935	11912	11577	0.99026	11553.5	0.990418
si	sCCA3	PIxGABA2	467	187	17391	17354	17459.6	0.355323	17425.5	0.349399
si	sCCA3	PIxMG	366	213	22578	22538	22777.4	0.173877	22722.2	0.192635
si	sCCA3	PIxNSC	269	141	9870	9858	9809.28	0.665788	9790.34	0.683756
si	sCCA3	PIxODC1	364	211	22155	22124	22227.4	0.364399	22185	0.384719
si	sCCA3	PIxOPC	349	163	13203	13177	13577.6	0.0110736	13544.3	0.0123579
